# DNA Damage–Induced Bcl-x<sub>L</sub> Deamidation Is Mediated by NHE-1 Antiport Regulated Intracellular pH

Rui Zhao<sup>1</sup>, David Oxley<sup>2</sup>, Trevor S. Smith<sup>2</sup>, George A. Follows<sup>3</sup>, Anthony R. Green<sup>3</sup>, Denis R. Alexander<sup>\*1</sup>

**1** Laboratory of Lymphocyte Signalling and Development, The Babraham Institute, Babraham, Cambridge, United Kingdom, **2** Protein Technologies Laboratory, The Babraham Institute, Babraham, Cambridge, United Kingdom, **3** Department of Haematology, University of Cambridge, Hills Road, Cambridge, United Kingdom

**The pro-survival protein Bcl-x<sub>L</sub> is critical for the resistance of tumour cells to DNA damage. We have previously demonstrated, using a mouse cancer model, that oncogenic tyrosine kinase inhibition of DNA damage–induced Bcl-x<sub>L</sub> deamidation tightly correlates with T cell transformation in vivo, although the pathway to Bcl-x<sub>L</sub> deamidation remains unknown and its functional consequences unclear. We show here that rBcl-x<sub>L</sub> deamidation generates an iso-Asp<sup>52</sup>/iso-Asp<sup>66</sup> species that is unable to sequester pro-apoptotic BH3-only proteins such as Bim and Puma. DNA damage in thymocytes results in increased expression of the NHE-1 Na/H antiport, an event both necessary and sufficient for subsequent intracellular alkalinisation, Bcl-x<sub>L</sub> deamidation, and apoptosis. In murine thymocytes and tumour cells expressing an oncogenic tyrosine kinase, this DNA damage–induced cascade is blocked. Enforced intracellular alkalinisation mimics the effects of DNA damage in murine tumour cells and human B-lineage chronic lymphocytic leukaemia cells, thereby causing Bcl-x<sub>L</sub> deamidation and increased apoptosis. Our results define a signalling pathway leading from DNA damage to up-regulation of the NHE-1 antiport, to intracellular alkalinisation to Bcl-x<sub>L</sub> deamidation, to apoptosis, representing the first example, to our knowledge, of how deamidation of internal asparagine residues can be regulated in a protein in vivo. Our findings also suggest novel approaches to cancer therapy.**

Citation: Zhao R, Oxley D, Smith TS, Follows GA, Green AR, et al. (2007) DNA damage–induced Bcl-x<sub>L</sub> deamidation is mediated by NHE-1 antiport regulated intracellular pH. *PLoS Biol* 5(1): e1. doi:10.1371/journal.pbio.0050001

## Introduction

The deamidation of internal asparaginyl and glutaminyl protein residues has attracted increasing attention over the past decade as a modification leading to significant changes in protein function [1,2]. The protein deamidation rates of more than 18,000 proteins have been computed, containing 230,000 individual asparaginyl residues, generating Asn half-lives of less than 1 d to 50 y or more [3,4]. Protein deamidation has broad biological implications, ranging from changes in the specificity of antigen presentation [5], to modifications in eye lens proteins [6], to the activation of RhoA by cytotoxic necrotizing factor [7], to aging [1], to name but a few examples.

The deamidation of Gln proceeds both enzymatically and nonenzymatically in physiological systems, whereas only the nonenzymatic deamidation of internal Asn residues has been reported, involving conversion to Iso-Asp:Asp in a ratio of about 3:1, with the precise ratio depending on the environment of the Asn residue [1,8]. Deamidation of both Gln and Asn residues in vitro can be greatly accelerated by exposure to either acid or alkaline pH, with minima in the range pH 4–6. Until recently, it was assumed that Asn protein deamidation rates in vivo were set up by a “fixed clock” that was defined only by the primary, secondary, and tertiary structures of proteins that specified the half-life of the particular Asn residue in question. However, this view has been radically changed by the recent observation that DNA damage induces the relatively rapid deamidation of the pro-survival protein Bcl-x<sub>L</sub> in an osteosarcoma cell line system [9], indicating that the deamidation “clock”, far from being fixed,

is a dynamic process that can be regulated in vivo by biologically critical events. Bcl-x<sub>L</sub> deamidation in response to DNA damage occurs at two internal Asn residues (Asn<sup>52</sup> and Asn<sup>66</sup>), causing a characteristic retardation on SDS-polyacrylamide gel electrophoresis (PAGE) gels [9–12]. Initial work from the Weintraub laboratory suggested that when Asn<sup>52</sup> and Asn<sup>66</sup> are both mutated to Asp, then Bcl-x<sub>L</sub> loses its ability to bind to the BH3-only pro-apoptotic protein Bim, thereby providing a putative linkage between DNA damage and apoptosis [9]. However, a secondary mutation was later identified, which, when corrected, enabled the N52D/N66D Bcl-x<sub>L</sub> to bind Bim, casting doubt on this interpretation [13].

Using a different model system, we have previously implicated the oncogene-mediated inhibition of DNA damage–induced Bcl-x<sub>L</sub> deamidation in the transformation of murine thymocytes [14,15]. Our transgenic mouse model of T cell lymphoma was generated by crossing mice lacking

**Academic Editor:** Douglas Green, St. Jude Children’s Research Hospital, United States of America

**Received** June 6, 2006; **Accepted** October 25, 2006; **Published** December 19, 2006

**Copyright:** © 2007 Zhao et al. This is an open-access article distributed under the terms of the Creative Commons Attribution License, which permits unrestricted use, distribution, and reproduction in any medium, provided the original author and source are credited.

**Abbreviations:** B-CLL, B-lineage chronic lymphoblastic leukemia; CHX, cycloheximide; DMA, 5-(N,N'-dimethyl)-amiloride; DN, double negative; Etop, etoposide; FACS, fluorescence activated cell sorter; IR, irradiation; OTK, oncogenic tyrosine kinase; PBMC, peripheral blood mononuclear cells; pH<sub>i</sub>, intracellular pH; pH<sub>e</sub>, extracellular pH; PI, propidium iodide

\* To whom correspondence should be addressed. E-mail: denis.alexander@bbsrc.ac.uk

## Author Summary

Cell survival and cell death (apoptosis) are controlled by a finely tuned ensemble of pro-survival and pro-apoptotic proteins. When the two types of protein are balanced, cells survive. But if the pro-survival proteins dominate, there is a danger that cells with damaged DNA will stay alive, leading to malignancy. One of the key pro-survival proteins, Bcl-x<sub>L</sub>, acts by blocking the actions of pro-apoptotic proteins. We show here that DNA damage results in an important modification of Bcl-x<sub>L</sub>. Specifically, when the amide groups are removed from two critical asparagine (amino acid) residues, Bcl-x<sub>L</sub> can no longer block pro-apoptotic proteins, leading to cell death. Surprisingly, Bcl-x<sub>L</sub> deamidation is catalysed not by an enzyme, but by increased pH inside the cell due to the up-regulation of an NHE-1 transporter that moves positive ions across the cell membrane. Indeed, artificially increasing pH causes Bcl-x<sub>L</sub> deamidation and apoptosis in the absence of initial DNA damage. Exploring this novel pathway may ultimately suggest approaches to cancer therapy, especially when malignant cells are resistant to chemotherapy or radiotherapy.

expression of the CD45 tyrosine phosphatase with a line expressing a nononcogenic level of the mutant *lck*<sup>F505</sup> tyrosine kinase [16]. All the *CD45*<sup>-/-</sup>*lck*<sup>F505</sup> progeny develop aggressive T cell lymphomas at the early CD4<sup>+</sup>CD8<sup>-</sup> stage of thymic development, typically at 5–12 wk of age. The absence of CD45-mediated dephosphorylation results in hyperphosphorylation of positive regulatory p56<sup>lck</sup> pTyr-394, causing hyperactivation of the kinase and triggering oncogenesis [15]. The model enables the investigation of the earliest oncogenic events in primary pretumorigenic thymocytes. Inhibition of DNA repair in *CD45*<sup>-/-</sup>*lck*<sup>F505</sup> mice leads to DNA damage, genomic instability, and chromosomal aberrations detectable in primary CD4<sup>+</sup>CD8<sup>-</sup> thymocytes before transformation. Despite a normal p53 response, DNA damage-induced apoptosis is suppressed in pretumorigenic thymocytes, correlating with the inhibition of Bcl-x<sub>L</sub> deamidation, the preservation of Bcl-x<sub>L</sub> binding to Bim, and the inhibition of cytochrome c release and the apoptotic caspase execution cascade. Therefore, we proposed that Bcl-x<sub>L</sub> deamidation is a critical switch in oncogenic kinase-induced T cell transformation, and we suggested that Bcl-x<sub>L</sub> deamidation to an Iso-Asp<sup>52</sup>/Iso-Asp<sup>66</sup> version, rather than the mutant N52D/N66D version investigated by the Weintraub laboratory, might be the key step in disabling the antiapoptotic functions of the protein [14,15].

Neither in the osteosarcoma cell line work [9] nor in our own work based on primary thymocytes [15] has there been any indication as to how DNA damage might induce Bcl-x<sub>L</sub> deamidation. Neither have there been previous reports in the literature showing how protein Asn deamidation in general might be regulated in vivo; we address here this question. We confirm that Bcl-x<sub>L</sub> deamidation does indeed destroy its ability to sequester pro-apoptotic proteins such as Bim and Puma, thereby establishing a clear molecular link between DNA damage, Bcl-x<sub>L</sub> deamidation, and apoptosis. Surprisingly, DNA damage-triggered deamidation in primary wild-type cells is mediated not enzymatically, but by intracellular alkalinisation caused by increased expression of the NHE-1 Na<sup>+</sup>/H<sup>+</sup> exchanger (antiport), events blocked by expression of the oncogenic tyrosine kinase (OTK). In the case of either murine or human cancer cells, enforced alkalinisation

triggers Bcl-x<sub>L</sub> deamidation, crippling its ability to provide protection from the pro-apoptotic consequences of DNA damage, thereby indicating possible novel approaches to cancer therapy.

## Results

### DNA Damage-Induced Bcl-x<sub>L</sub> Deamidation Does Not Depend on Mitochondrial Apoptosis

An important consideration is whether DNA damage-induced Bcl-x<sub>L</sub> deamidation in murine thymocytes is a cause or consequence of thymic apoptosis. Figure 1 shows that whereas the addition of the caspase inhibitor Z-VAD-fmk, as expected, inhibited DNA damage-induced apoptosis in murine thymocytes (Figure 1A), no inhibition of DNA damage-induced Bcl-x<sub>L</sub> deamidation was observed in cell aliquots taken from the same thymic cultures (Figure 1B). It is known that in the absence of Bax and Bak, BH3-only proteins are unable to induce apoptosis [17]. We therefore used short hairpin RNA (shRNA) to deplete Bax and Bak from CD4<sup>+</sup>CD8<sup>-</sup> (double-negative, DN) thymocytes, confirmed that depletion was sufficient to block caspase 9 cleavage (Figure S1A), and showed that DNA damage-induced Bcl-x<sub>L</sub> deamidation proceeded normally in the absence of Bax and Bak (Figure 1C). We also showed that Bcl-x<sub>L</sub> deamidation was clearly detectable within 3–6 h after the instigation of DNA damage, and proceeded in parallel with increased apoptosis (Figure S1B and S1C). These results show that Bcl-x<sub>L</sub> deamidation is not caused by mitochondrial apoptosis and are consistent with a role for deamidation upstream of the apoptotic executor pathway. Further data presented below establish a more direct causal relationship between Bcl-x<sub>L</sub> deamidation and apoptosis in DNA damaged thymocytes.

### Bcl-x<sub>L</sub> Deamidation In Situ Involves Conversion of Asn<sup>52</sup>/Asn<sup>66</sup> to Iso-Asp<sup>52</sup>/Iso-Asp<sup>66</sup>, Preventing Sequestration of Bim and Puma

We previously noted that whereas the ability of Bcl-x<sub>L</sub> to bind Bim was ablated in control thymocytes exposed to DNA damage, it was strikingly retained in pretumorigenic *CD45*<sup>-/-</sup>*lck*<sup>F505</sup> thymocytes, tightly correlating with the resistance to Bcl-x<sub>L</sub> deamidation noted in these cells [15]. However, work from the Weintraub laboratory suggests that deamidated Bcl-x<sub>L</sub> still binds Bim [13], thereby casting doubt on the model that Bcl-x<sub>L</sub> deamidation triggers apoptosis. Because the sequestration of BH3-only proteins by Bcl-x<sub>L</sub> is thought to explain its anti-apoptotic function [18], resolution of this question is clearly important for establishing a molecular link between DNA damage and apoptosis. We therefore carried out a series of cellular and biochemical experiments to address this key point.

Figure 2A shows that Bcl-x<sub>L</sub> measured in whole cell lysates from pretumorigenic *CD45*<sup>-/-</sup>*lck*<sup>F505</sup> murine thymocytes is resistant to deamidation following  $\gamma$  irradiation, consistent with our previous findings [15]. Immunoprecipitation of the pro-apoptotic protein Bim, followed by immunoblotting for Bcl-x<sub>L</sub>, revealed that Bim sequestered only the N52/N66 Bcl-x<sub>L</sub> and failed to bind the slower migrating deamidated protein (Figure 2A, upper panel), although the amount of Bim in each immunoprecipitate was comparable (Figure 2A, lower panel). Because the BH3-only protein Puma, not Bim,

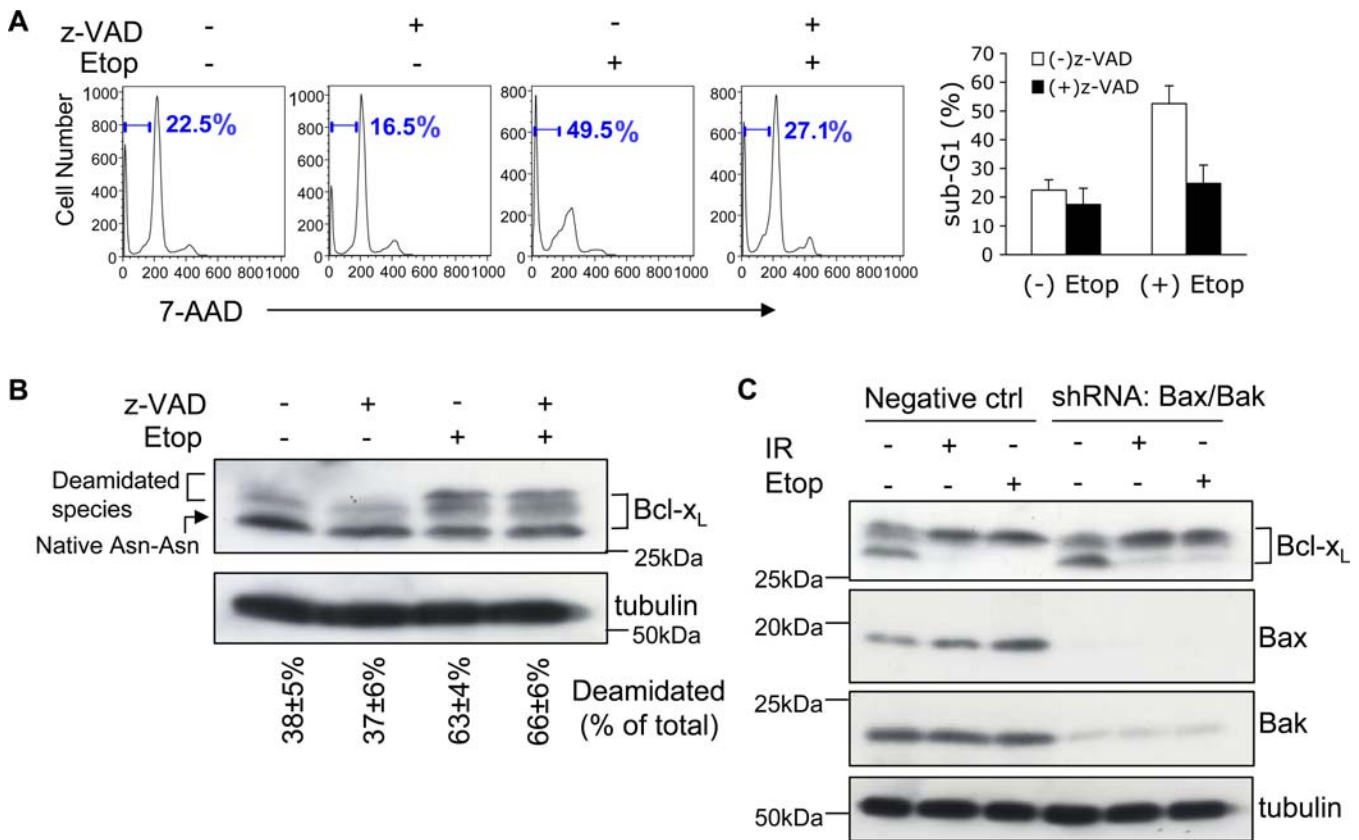

**Figure 1.** DNA Damage-Induced Bcl-x<sub>L</sub> Deamidation Is Mitochondrial Apoptosis-Independent

(A) Wild-type thymocytes were pre-incubated with or without Z-VAD-fmk (200 μM), and were then cultured with or without etoposide for 24 h, harvested, and apoptosis was measured by measuring the sub-G1 peak by flow cytometry. The histograms (right panel) represent mean values ± SD (*n* = 3).

(B) Aliquots of the cells from (A) incubated in the presence or absence of Z-VAD-fmk (200 μM) were analysed for the expression of Bcl-x<sub>L</sub> and tubulin (as loading control) by immunoblotting. The upper and lower bands of Bcl-x<sub>L</sub> were quantified and expressed as a percentage of total Bcl-x<sub>L</sub>. The percentages shown below each lane are means ± SD (*n* = 3).

(C) Plasmids of shRNA Bax (GFP) and shRNA Bak (DsRed) were cotransfected into purified DN thymocytes using an Amaxa nucleofactor kit. 48 h later, GFP<sup>+</sup> DsRed<sup>+</sup> cells were purified by flow cytometry and treated with etoposide (Etop, 25 μM) for 30 h or exposed to irradiation (IR, 5 Gy) followed by 30 h in culture. DN thymocytes transfected with negative control plasmids were treated in parallel. Cells were then processed for immunoblotting with Bcl-x<sub>L</sub> antibody. The immunoblot was reprobed for Bax and Bak to check the efficiency of gene knockdown. Tubulin was also reprobed as a loading control. doi:10.1371/journal.pbio.0050001.g001

plays a major role in DNA-damage triggered apoptosis [19,20], we also showed that both Puma and Bim are found in Bcl-x<sub>L</sub> immunoprecipitates from etoposide treated *CD45<sup>-/-</sup>Lck<sup>F505</sup>* thymocytes, whereas sequestration is ablated in wild-type cells, correlating with Bcl-x<sub>L</sub> deamidation (Figure 2B). A comparable result was obtained when Puma immunoprecipitates were blotted for Bcl-x<sub>L</sub> (Figure S2A). Therefore, deamidated Bcl-x<sub>L</sub> appears unable to sequester BH3-only proteins.

To confirm the results using intact thymocytes, we carried out *in vitro* biochemical experiments. Recombinant purified His-tagged Bcl-x<sub>L</sub> was exposed to alkaline conditions to cause partial deamidation and separated by anion-exchange chromatography into three peaks (Figure 2C, peaks A, B and C). Mass spectrometric analysis revealed an increase of 1 Da for peak B relative to peak A, and a further increase of 1 Da for peak C relative to peak B (Figure 2C). On SDS-PAGE gels, peak A Bcl-x<sub>L</sub> migrated slightly faster than the more acidic peaks B and C (Figure 2D), reproducing the characteristic profile of N52/N66 Bcl-x<sub>L</sub> and its deamidated versions found

in our cellular studies (Figure 1B). It has already been demonstrated that these migratory shifts are not caused by phosphorylation [9,12]. In fact, deamidation of a single Asn increases protein mass by 1 Da, at the same time increasing its net negative charge, confirming that the shifts are due to deamidation. Importantly, when the three species of rBcl-x<sub>L</sub> were tested for their ability to bind to Bim in wild-type thymic lysates, only peak A bound Bim effectively, whereas binding to peak B rBcl-x<sub>L</sub> was reduced by 88% ± 2% and completely ablated using peak C rBcl-x<sub>L</sub> (Figure 2D, upper panel). Figure 2E shows that the Asp<sup>52</sup>/Asp<sup>66</sup> version of Bcl-x<sub>L</sub>, or the Ala<sup>52</sup>/Ala<sup>66</sup> version that cannot be deamidated, does still bind both Bim and Puma, consistent with the correction published by the Weintraub laboratory [13]. We therefore determined whether rBcl-x<sub>L</sub> Asn<sup>52</sup> and Asn<sup>66</sup> convert mainly to Asp or to iso-Asp upon alkali treatment. Consistent with previous results [8], Figure 2F and Figure S3 show that the ratios of iso-Asp:Asp conversion for Asn<sup>52</sup> and Asn<sup>66</sup> are 10:1 and 5:1, respectively. Kinetic analysis revealed that deamida-

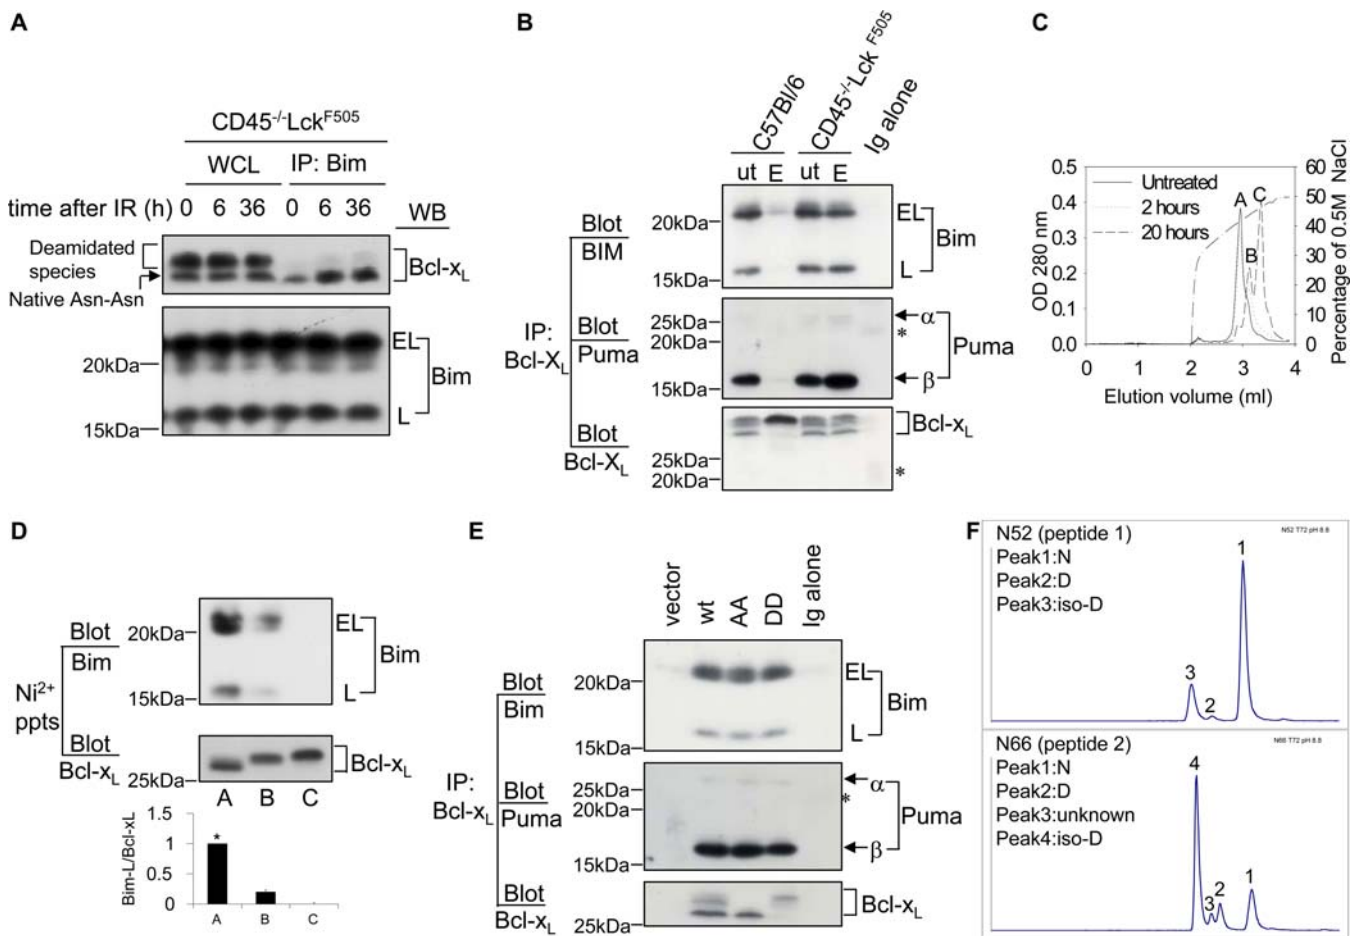

**Figure 2.** Deamidation Disrupts the Sequestration of BH3-Only Proteins by Bcl-x<sub>L</sub>

(A) Bim binds to the native (Asn-Asn) but not deamidated forms of Bcl-x<sub>L</sub>. Wild-type (C57BL/6) thymocytes ( $1.5 \times 10^7$ ) were exposed to 5 Gy irradiation (IR) and then maintained in culture for the times shown, after which cells were lysed and either separated as whole cell lysates (WCL) or as Bim immunoprecipitates, followed by immunoblotting for either Bcl-x<sub>L</sub> or for Bim. Bim migrates as “extra-long” (EL) or “long” (L) forms.

(B) Bcl-x<sub>L</sub> was immunoprecipitated from lysates derived from purified DN thymocytes treated with/without etoposide (ut/E), followed by immunoblotting for Bim or Puma. The asterisk indicates the light chain of the Bcl-x<sub>L</sub> antibody used for immunoprecipitation.

(C) Anion exchange chromatography of purified rBcl-x<sub>L</sub>. Sample A was untreated; samples B and C were exposed to pH 8.8 at 37 °C for 2 h and 20 h, respectively. The Figure illustrates superimposed elution profiles for each sample. Peaks A, B, and C had molecular masses of 25, 015.6; 25, 016.4, and 25, 017.2, respectively.

(D) Bim binds to native but not to deamidated rBcl-x<sub>L</sub>. The three different forms of Bcl-x<sub>L</sub> (A, B, and C) purified by anion-exchange column chromatography shown in (C) were incubated in wild-type thymic lysates ( $1.5 \times 10^7$  cell equivalents) at 4 °C for 2 h and then precipitated using nickel beads. The precipitated products were immunoblotted for Bim and Bcl-x<sub>L</sub>. Quantification of the Bim-L/Bcl-x<sub>L</sub> ratios  $\pm$  SD from three independent experiments is shown in the histogram, with the lane A ratio normalised to 1 (\*).

(E) Primary thymocytes were retrovirally transduced with empty vector or Bcl-x<sub>L</sub> constructs (wild-type, N52A-N66A, or N52D-N66D). Bcl-x<sub>L</sub> was immunoprecipitated from lysates derived from  $1.5 \times 10^6$  sorted GFP-positive cells per lane, followed by immunoblotting for Bim or Puma. Note that in the vector lane, at this exposure endogenous Bcl-x<sub>L</sub> is not visible because of the small number of cells used. The asterisk indicates the light chain of the Bcl-x<sub>L</sub> antibody used for immunoprecipitation.

(F) Peptides SDVEENRTEAPEGTESEMTPSAINGNPSW (peptide 1) and HLADSPAVNGATGHSSSL (peptide 2), and the corresponding deamidated forms, containing the putative deamidation sites N52 and N66, respectively, were generated by digestion of rBcl-x<sub>L</sub> with chymotrypsin. The chromatographic conditions used for the separation of the peptides in the LC-MS analyses were optimised so as to resolve the Asn, Asp, and iso-Asp forms of peptides 1 and 2. The Asp and iso-Asp forms of the two peptides were identified by spiking an aliquot of a digestion mixture with Asp- or iso-Asp-containing synthetic peptides prior to LC-MS (Figure S3). The chromatograms show LC-MS analyses at time point 72 h of the rBcl-x<sub>L</sub> base treatment. For both peptides, the major deamidation product is the iso-Asp form; the iso-Asp:Asp ratios are approximately 10:1 for N52 and 5:1 for N66. The unknown peak 3 in peptide 2 could be an isomer of peak 2 or peak 4. doi:10.1371/journal.pbio.0050001.g002

tion of Asn<sup>66</sup> to iso-Asp is much faster than for Asn<sup>52</sup> (unpublished data).

Taken together, our results show that conversion of Bcl-x<sub>L</sub> Asn<sup>52</sup> and Asn<sup>66</sup> to iso-Asp, but not Asp, prevents sequestration of BH3-only proteins. Peak B represents rBcl-x<sub>L</sub> deamidated at either Asn<sup>52</sup> or Asn<sup>66</sup>, whereas peak C is deamidated at both sites (Figure 2C and 2D). Deamidation to iso-Asp causes greater perturbations of protein structure

than conversion to Asp [1,8], presumably explaining the loss of BH3-only protein binding.

#### DNA Damage-Induced Bcl-x<sub>L</sub> Deamidation and Apoptosis Is Mediated by Intracellular Alkalinisation

Until now, the in vivo mechanism for the deamidation of internal protein Asn residues has not been described for any protein. Because protein Asn deamidation is accelerated by

increased pH *in vitro*, we investigated intracellular pH change (pH<sub>i</sub>) as a possible regulatory mechanism in thymocytes. Figure 3A shows that after DNA damage, the pH<sub>i</sub> of live wild-type CD4<sup>+</sup>CD8<sup>-</sup> thymocytes increased to 7.55, whereas no change was observed in pretumorigenic cells. But is that increase sufficient to cause Bcl-x<sub>L</sub> deamidation? To address this question, we incubated wild-type thymocytes in the pH range of 7.2–8.0 for 20 h in the presence of the Na<sup>+</sup> ionophore monensin to ensure complete equilibration of pH<sub>i</sub> and extracellular pH (pH<sub>e</sub>), and to neutralize acidic intracellular compartments [21], and we then assessed the extent of Bcl-x<sub>L</sub> deamidation. Figure 3B shows that whereas only 22.5% ± 3.2% was deamidated at pH 7.2, this increased to 56.1% ± 3.8% at pH 7.6 and 67.0% ± 4.5% at pH 8.0. Therefore, a rise in pH<sub>i</sub> comparable with that observed after DNA damage (Figure 3A) is sufficient to cause substantial deamidation. Furthermore, the addition of Z-VAD-fmk to thymic cultures following DNA damage did not inhibit their alkalisation (Fig. 3C), showing that the rise in pH<sub>i</sub> is not downstream of caspase activation. To investigate Bcl-x<sub>L</sub> deamidation, pH<sub>i</sub>, and apoptosis in parallel, we manipulated pH<sub>i</sub> values artificially by incubating cells at varying pH<sub>e</sub> values in the absence of monensin. The left panel of Figure 3D shows that when DNA damage was induced in wild-type thymocytes, Bcl-x<sub>L</sub> deamidation could be largely prevented by artificially maintaining the pH<sub>i</sub> at 7.1 (value shown in Figure 3E, left panel), thereby reducing the percentage of apoptotic CD4<sup>+</sup>CD8<sup>-</sup> thymocytes by 2-fold relative to those incubated at physiological pH (Figure 3F, left panel). Conversely, Figure 3D (right panel) shows that the resistance to Bcl-x<sub>L</sub> deamidation observed in DNA-damaged pretumorigenic thymocytes could be completely overcome by artificially increasing the pH<sub>i</sub> to 7.55 or above (Figure 3E, right panel), correlating with a 2-fold increase in the percentage of apoptotic CD4<sup>+</sup>CD8<sup>-</sup> thymocytes relative to those incubated at physiological pH (Figure 3F, right panel). Interestingly, enforced alkalisation alone in the absence of DNA damage caused a marked increase in Bcl-x<sub>L</sub> deamidation in the OTK expressing thymocytes (Figure 3D, right panel), with a concomitant increase in apoptosis (Figure 3F, right panel), albeit at a level lower than with DNA damage, perhaps reflecting the somewhat lower pH<sub>i</sub> values achieved under these conditions (Figure 3E, right panel).

We considered that the tight correlation between pH<sub>i</sub>, Bcl-x<sub>L</sub> deamidation, and apoptosis might nevertheless be coincidental and that enforced alkalisation might be inducing apoptosis by a mechanism independent of Bcl-x<sub>L</sub> deamidation. Mutant Bcl-x<sub>L</sub> Ala<sup>52</sup>/Ala<sup>66</sup> or Asp<sup>52</sup>/Asp<sup>66</sup>, both of which sequester BH3-only proteins (Figure 2E), were therefore over-expressed in wild-type CD4<sup>+</sup>CD8<sup>-</sup> thymocytes by retroviral transduction prior to enforced alkalisation by incubation in media at pH 8.0 or 8.5. Figure 3G (middle panel) shows that, as expected, the Ala<sup>52</sup>/Ala<sup>66</sup> mutant migrates as the lower nondeamidated version of Bcl-x<sub>L</sub>, whereas Asp<sup>52</sup>/Asp<sup>66</sup> migrates as the more negatively charged deamidated version. Interestingly, in the cells expressing these mutant forms of Bcl-x<sub>L</sub>, the apoptosis induced by enforced alkalisation was reduced 4-fold compared to cells transduced with empty vector, or more than 2-fold in comparison with the wild-type protein (Figure 3G, right panel), which of course undergoes deamidation in response to alkali treatment. These results show that Bcl-x<sub>L</sub>

in a version able to sequester BH3-only proteins protects thymocytes from an enforced increase in pH<sub>i</sub>. Nevertheless, protection was not absolute, suggesting that Bcl-x<sub>L</sub> may not be the only mechanism protecting cells from apoptosis triggered by alkalisation. As a further control, we have confirmed that Bcl-x<sub>L</sub> isolated from wild-type thymocytes exposed to a high pH buffer can no longer sequester Bim (Figure S2B), thereby mimicking the effects of DNA damage (Figure 2A).

Taken overall, these results demonstrate that intracellular alkalisation following DNA damage is both necessary and sufficient for nonenzymatic Bcl-x<sub>L</sub> deamidation, that the oncogenic suppression of Bcl-x<sub>L</sub> deamidation in pretumorigenic thymocytes is caused by inhibition of alkalisation, and that versions of Bcl-x<sub>L</sub> competent for BH3-only protein sequestration are sufficient per se to protect cells from apoptosis at alkaline pH<sub>i</sub>.

### DNA Damage-Induced Alkalisation, Bcl-x<sub>L</sub> Deamidation, and Apoptosis are Mediated by Increased NHE-1 Antiport Expression

We next investigated the molecular mechanisms leading from DNA damage to the regulation of pH<sub>i</sub> and subsequent Bcl-x<sub>L</sub> deamidation. Figure 4A shows that *de novo* protein synthesis is essential for Bcl-x<sub>L</sub> deamidation following DNA damage in wild-type thymocytes. Because the NHE-1 Na/H antiport is a well-established regulator of pH<sub>i</sub> [22] and has previously been implicated in the regulation of thymic apoptosis [23], we measured its expression in wild-type thymocytes after DNA damage and found that the NHE-1 level increased 2.5-fold within 5 h, whereas this increase was completely suppressed in pretumorigenic thymocytes (Figure 4B). No inhibition of increased NHE-1 expression in wild-type thymocytes was observed following addition of the Z-VAD-fmk caspase inhibitor (Figure S4A) nor following depletion of Bax and Bak from the cells (Figure S4B). We therefore carried out a further series of experiments to demonstrate that there was a direct causal linkage between the regulation of NHE-1 expression, pH<sub>i</sub>, Bcl-x<sub>L</sub> deamidation, and apoptosis. Given that the OTK blocks DNA-damage induced NHE-1 expression in pretumorigenic thymocytes, this provides a powerful system for examining the consequences of experimentally enforcing NHE-1 expression in these cells by retroviral transduction. As Figure 4C illustrates (upper panel), an enforced 2-fold–3-fold increase in NHE-1 expression in pretumorigenic thymocytes, without DNA damage, restored Bcl-x<sub>L</sub> deamidation to a level comparable to that observed in a retrovirally transduced wild-type control in five separate experiments, thereby bypassing the OTK-mediated inhibition in deamidation. Overexpression of NHE-1 increased both pH<sub>i</sub> and apoptosis to comparable levels in both pretumorigenic and wild-type thymocytes (Figure 4C, lower panels). These results suggest that increased NHE-1 expression per se is sufficient to cause increased pH<sub>i</sub>, Bcl-x<sub>L</sub> deamidation and apoptosis. To address this question further, we used the selective NHE-1 inhibitor 5-(N,N'-dimethyl)-amiloride (DMA) to block the actions of the antiport following its increased expression on thymocytes upon DNA damage. Figure 4D shows that DMA prevented the alkalisation of wild-type thymocytes following DNA damage (top left panel), their apoptosis (top right panel), and Bcl-x<sub>L</sub>

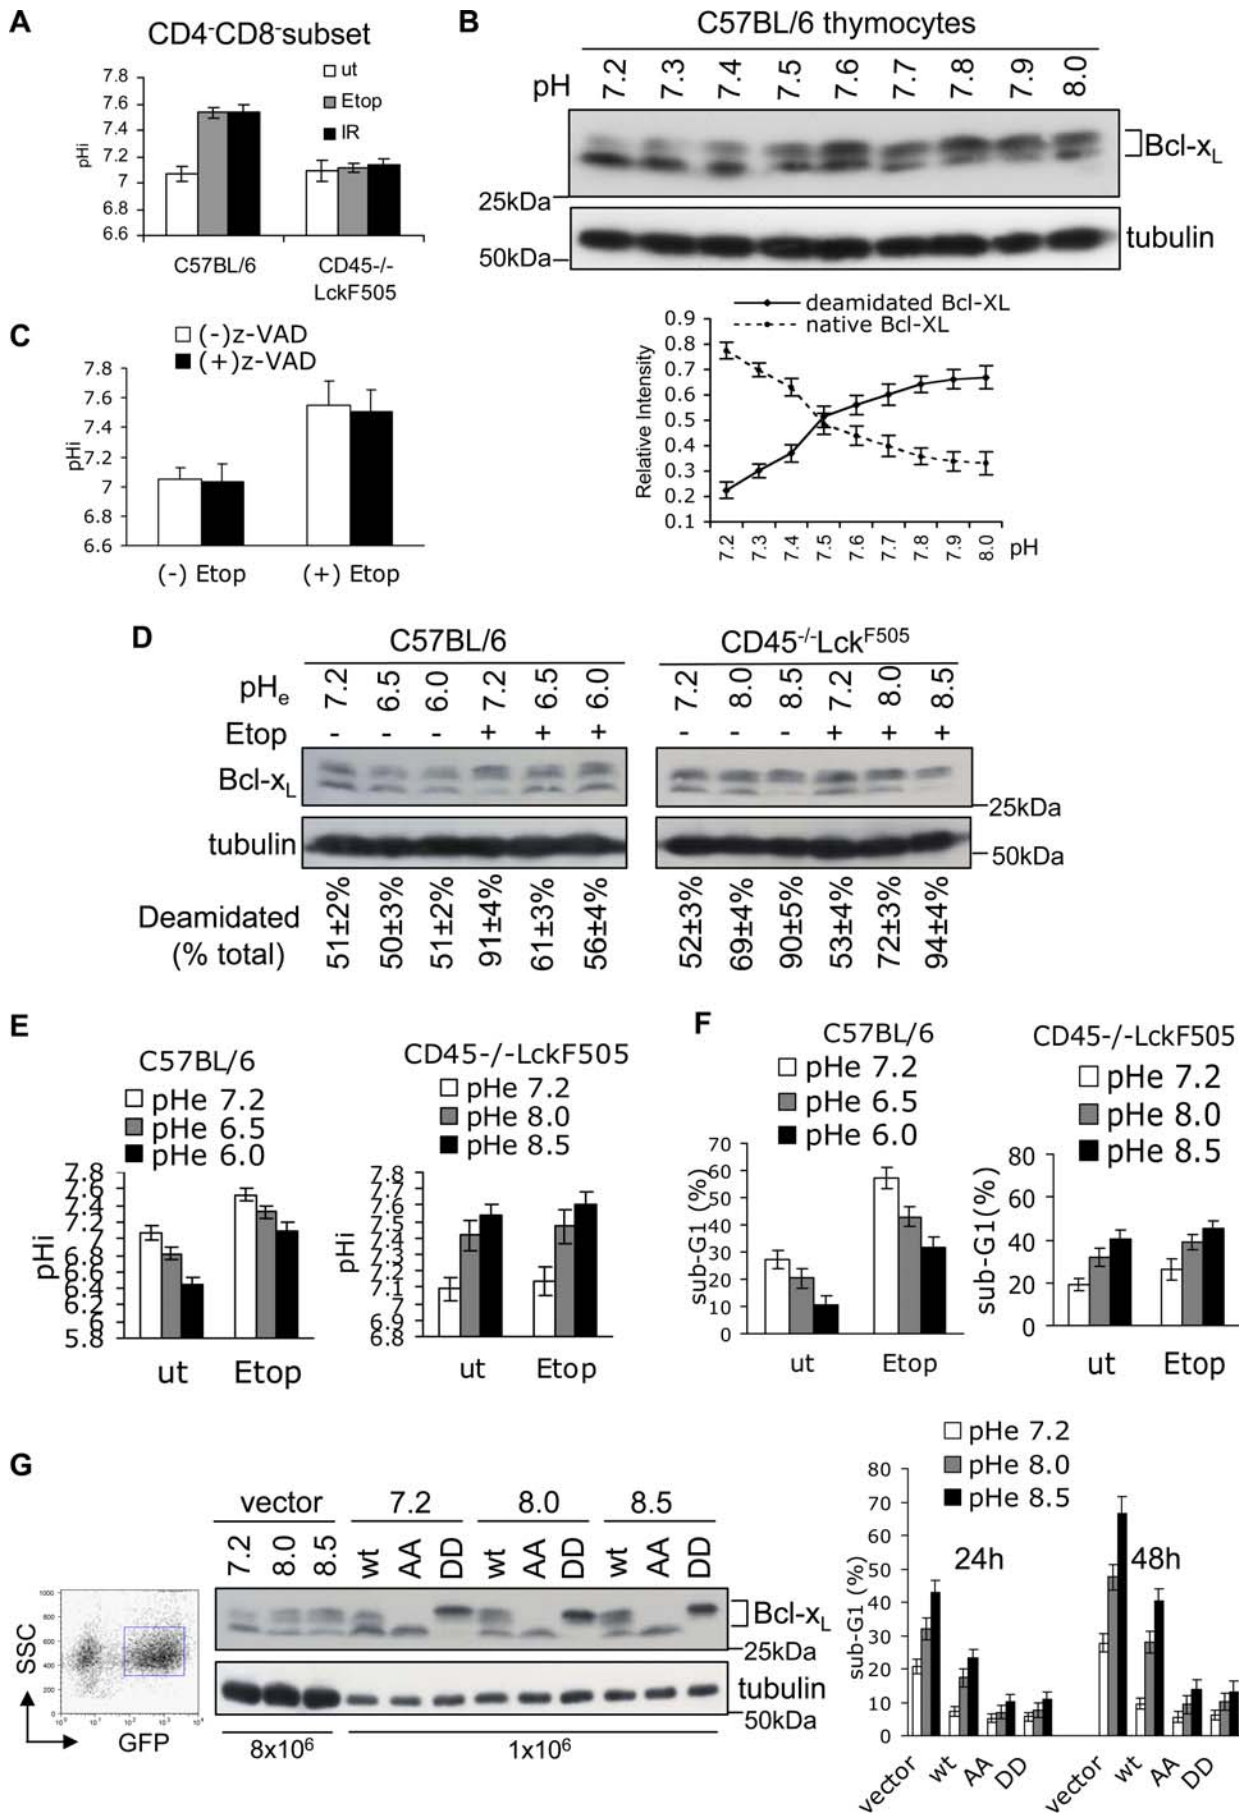

**Figure 3. DNA Damage Causes Intracellular Alkalinisation and Subsequent Bcl-x<sub>L</sub> Deamidation**

(A) Intracellular alkalinisation occurs following DNA damage in wild-type but not in pretumorigenic *CD45<sup>-/-</sup>Lck<sup>F505</sup>* thymocytes. Cells were treated with etoposide (Etop) for 20 h or exposed to 5 Gy of irradiation (IR) and then maintained in culture for 20 h. pH<sub>i</sub> was measured using SNARF by FACS in the gated live CD4<sup>+</sup>CD8<sup>-</sup> subset. The histograms represent mean values ± SD (*n* = 5).

(B) Enforced intracellular thymic alkalinisation causes Bcl-x<sub>L</sub> deamidation. Wild-type thymocytes were maintained in RPMI-1640/10% bovine fetal calf serum buffered at the indicated pH with Tris-HCl for 20 h in the presence of 20 μM monensin prior to lysis and immunoblotting for Bcl-x<sub>L</sub>. To minimize any deamidation produced during the gel-running process, the resolving gel buffer was adjusted to pH 8.0 in this experiment. The mean ratio of the lower band (native Bcl-x<sub>L</sub>) or upper band (deamidated Bcl-x<sub>L</sub>) to the total (upper plus lower bands) is shown in the graph (lower panel). The error bars represent SD (*n* = 3). Note that deamidation becomes prominent at pH 7.5.

(C) Aliquots of the cells from Figure 1A incubated in the presence or absence of Z-VAD-fmk (200 μM) were analysed for pH<sub>i</sub>. The histograms represent mean values ± SD (*n* = 3).

(D) Wild-type or *CD45<sup>-/-</sup>Lck<sup>F505</sup>* pretumorigenic thymocytes were cultured for 24 h in media at the pH shown without monensin, with or without etoposide, and then analysed for Bcl-x<sub>L</sub> deamidation by immunoblotting. The upper and lower bands were quantified and the percentage of upper bands in total Bcl-x<sub>L</sub> calculated. The percentages shown below each lane are means ± SD (*n* = 5).

(E) Aliquots of cells used in (D) were assessed for pH<sub>i</sub> by FACS. The histograms show the pH<sub>i</sub> of live gated CD4<sup>+</sup>CD8<sup>-</sup> thymocytes from five independent experiments ± SD. The pH<sub>e</sub> values refer to the pH values of the extracellular media.

(F) Apoptosis of aliquots of the cells from (D) was analysed by FACS. The histogram shows the sub-G1 peak (%) of CD4<sup>+</sup>CD8<sup>-</sup> thymocytes from five independent experiments ± SD.

(G) Wild-type (wt), N52A-N66A (AA), N52D-N66D (DD) Bcl-x<sub>L</sub>, and empty vector were retrovirally transduced into thymocytes. GFP-positive cells were FACS sorted (left panel) and cultured in media with the pH<sub>e</sub> shown for 24 h or 48 h, then processed for immunoblotting with Bcl-x<sub>L</sub> antibody (middle panel). Note that 8 × 10<sup>6</sup> and 1 × 10<sup>6</sup> cell equivalents were loaded per lane for the empty vector (lanes 1–3) and Bcl-x<sub>L</sub> (lanes 4–12) transfectants, respectively, such that the endogenous Bcl-x<sub>L</sub> is invisible in lanes 4–12. The histogram (right panel) shows mean apoptosis (sub-G1) values ± SD generated from five independent experiments.

doi:10.1371/journal.pbio.0050001.g003

deamidation (lower panel), correlating with increased survival (Figure S5A).

To extend these findings, we also used shRNA to deplete thymocytes of NHE-1 protein (Figure S6A). NHE-1 knock-down almost completely blocked the actions of DNA damage in causing Bcl-x<sub>L</sub> deamidation (Figure 5A), intracellular alkalinisation (Figure 5B), or apoptosis (Figure 5C and Figure S6B). We measured apoptosis by two different methods to ensure that DNA damage-induced cell death following retroviral transduction was by apoptosis and not by necrosis. Figure 5C and Figure S6B illustrate that double staining for Annexin V and propidium iodide (PI) followed by FACS analysis revealed a major increase in Annexin V<sup>+</sup> PI<sup>-</sup> (apoptotic) cells following transduction with the negative control shRNA followed by either γ irradiation or treatment with etoposide, whereas there was no increase in apoptotic cells above baseline in the cells depleted of NHE-1: DNA damage-induced apoptosis was blocked 100%. Comparable results were obtained by measuring the sub-G1 peak by FACS (unpublished data) and NHE-1 depletion also correlated with increased survival (Figure S5B).

We considered that post-translational modification of the NHE-1 antiport, in addition to regulation of its expression, might also be involved in mediating the DNA damage response. For example, a number of serine kinases have been shown to regulate NHE-1 phosphorylation and activity [24,25], so we investigated the pSer and pThr levels in NHE-1 immunoprecipitates from irradiated wild-type and pretumorigenic thymocytes, but the basal level of phosphorylation did not change after DNA damage and was comparable between the two cell types (Figure S6C). Nevertheless, we cannot formally exclude the possibility that not all pSer/pThr sites were recognised by the cocktail of monoclonal antibodies (mAbs) used. Taken together, our findings therefore suggest that the increased expression of the NHE-1 transporter is both necessary and sufficient for DNA damage-induced alkalinisation, Bcl-x<sub>L</sub> deamidation, and apoptosis in wild-type thymocytes, and that the suppression of these three parameters in pretumorigenic thymocytes is caused by oncogenic inhibition of the DNA damage-triggered increase in NHE-1 expression.

### Enforced Alkalinisation Causes Increased Bcl-x<sub>L</sub> Deamidation and Apoptosis in Murine and Human Cancer Cells

The experiments illustrated in Figures 1–5 were all carried out on wild-type or primary pretumorigenic *CD45<sup>-/-</sup>lck<sup>F505</sup>* thymocytes. Signalling pathways can be markedly different in fully transformed cells compared to their pretransformed counterparts. We therefore wondered whether *CD45<sup>-/-</sup>lck<sup>F505</sup>* T cell tumour cells, which develop from CD4<sup>+</sup>CD8<sup>-</sup> thymocytes [16], might display a comparable set of properties. Figure S7 shows that this was indeed the case: murine tumour cells resistant to genotoxic insult at physiological pH<sub>i</sub> values can be sensitised to die by enforced alkalinisation leading to Bcl-x<sub>L</sub> deamidation. Furthermore, a modest rise in pH<sub>i</sub> following incubation in a mildly alkaline buffer produces levels of Bcl-x<sub>L</sub> deamidation and apoptosis in murine tumour cells comparable to those observed by adding a DNA damaging reagent to wild-type thymocytes incubated at physiological pH.

Chronic lymphocytic leukaemia (CLL) is the most common adult haematological malignancy in the Western world and, like many cancers, is characterised by the development of drug resistance. We therefore determined whether genotoxic treatment in vitro of primary human B lineage CLL (B-CLL) cells might cause increased NHE-1, alkalinisation, Bcl-x<sub>L</sub> deamidation, and apoptosis, as in primary murine thymocytes (Figures 3–5), or whether this might be inhibited, as with the murine cancer cells (Figure S7). In addition, we examined the consequences for these parameters of incubating cancer cells in alkaline pH buffers. To perform these investigations, we divided each sample of patient cancer cells into nine aliquots that were either untreated, subjected to γ irradiation, or exposed to etoposide, followed by incubation at pH 7.2, pH 8.0, or pH 8.5 for 24 h. Each aliquot was then further subdivided into three samples to measure pH<sub>i</sub>, Bcl-x<sub>L</sub> deamidation, and apoptosis. As expected, exposure of cells to mildly alkaline buffers generated pH<sub>i</sub> values that displayed some variation between samples from different patients within a narrow range. The 18 values per patient obtained from 10 different patients, the mean values calculated for each pH<sub>e</sub> value considered separately, and representative

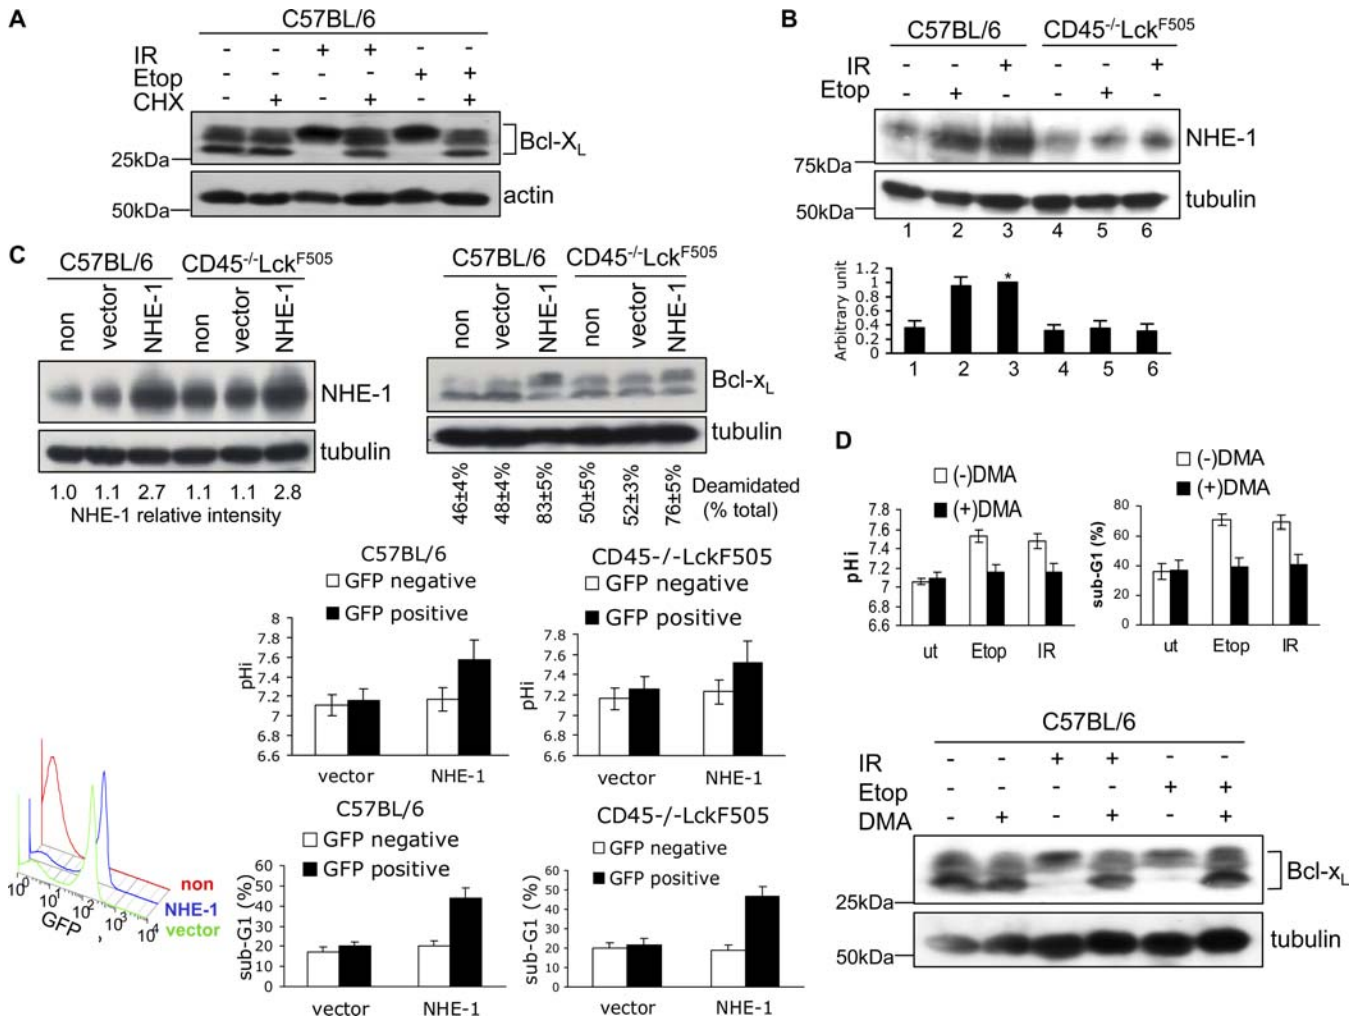

**Figure 4.** Bcl-x<sub>L</sub> Deamidation Induced by DNA Damage Involves Up-Regulation of the NHE-1 Na/H Antiporter

(A) Bcl-x<sub>L</sub> deamidation induced by DNA damage requires de novo protein synthesis. Wild-type thymocytes were either treated with etoposide for 24 h (Etop), or exposed to 5 Gy of irradiation (IR) and then maintained in culture for 24 h, with or without 0.5 μM cycloheximide (CHX). Cell lysates were processed by immunoblotting for Bcl-x<sub>L</sub> or β-actin (loading control).

(B) DNA damage causes up-regulation of NHE-1 in wild-type but not in CD45<sup>-/-</sup>Lck<sup>F505</sup> thymocytes. Wild-type or CD45<sup>-/-</sup>Lck<sup>F505</sup> thymocytes were either treated with etoposide (Etop) for 5 h, or exposed to 5 Gy of irradiation (IR) and then maintained in culture for 5 h before immunoblotting for NHE-1 or tubulin (loading control). The histogram shows the quantification of relative NHE-1 expression levels SD from five independent experiments. Lane 3 was defined as 1 (\*).

(C) Migri-NHE-1 or empty Migri vector were transfected into wild-type or pretumorigenic CD45<sup>-/-</sup>Lck<sup>F505</sup> thymocytes. 72 h after the first round of infection, cells were immunoblotted for NHE-1 and Bcl-x<sub>L</sub>. NHE-1 expression levels (NHE-1 relative intensity) were normalised for loading using tubulin values. Deamidation was calculated as in Figure 1B. The lower left FACS histogram shows the infection efficiency for nontransfected (non), empty-vector transfected (vector), or NHE-1 transfected (NHE-1) cells as percentage GFP-positive cells. The lower right histograms show the mean pH<sub>i</sub> and apoptosis (sub-G1) values ± SD (n = 5) analysed on GFP-negative and positive cells.

(D) The NHE-1 inhibitor DMA blocks DNA damage-induced alkalisation (top left panel), Bcl-x<sub>L</sub> deamidation (lower panel) and apoptosis (top right panel) in wild-type thymocytes. Thymocytes were treated with Etoposide for 24 h, or exposed to 5 Gy of irradiation and then maintained in culture for 24 h, with or without 200 μM DMA. pH<sub>i</sub> was measured by FACS on live CD4<sup>-</sup>CD8<sup>-</sup> cells, and the sub-G1 peak was analysed by FACS on CD4<sup>-</sup>CD8<sup>-</sup> cells to assess apoptosis. The histograms represent mean values ± SD (n = 3).

doi:10.1371/journal.pbio.0050001.g004

Bcl-x<sub>L</sub> deamidation results from a single patient are illustrated in Figure 6A, Figure S8A, and Figure S8B, respectively. Interestingly, unlike the murine tumour cells expressing an OTK, the B-CLL cells behaved somewhat more like wild-type thymocytes in that DNA damage at physiological pH<sub>e</sub> caused a mean increase of pH<sub>i</sub> of 0.22 units, an 8% increase in Bcl-x<sub>L</sub> deamidation, and an 18% increase in the number of cells undergoing apoptosis (Figure 6A and Figure S8A), compared to the higher thymocyte values of 0.45 pH<sub>i</sub> units, 40% increase, and 37% increase, respectively (Figure 3). The human cancer cell values for these parameters

were greatly increased at alkaline pH<sub>e</sub>, generating tight correlations between increasing pH<sub>i</sub>, Bcl-x<sub>L</sub> deamidation, and apoptosis (*r* values shown in Figure 6A). Thus, a mean increased pH<sub>i</sub> of 0.5 correlated with 1.7-fold and 2.4-fold increases in Bcl-x<sub>L</sub> deamidation and apoptosis, respectively. It is also striking that enforced intracellular alkalisation alone (by 0.3 pH<sub>i</sub> units), in the absence of experimentally induced DNA damage, was itself sufficient to increase Bcl-x<sub>L</sub> deamidation and apoptosis by 1.5-fold and 1.8-fold, respectively. This point is further illustrated by the gray shaded area shown in Figure 6A, which encompasses the overlap in sub-G1



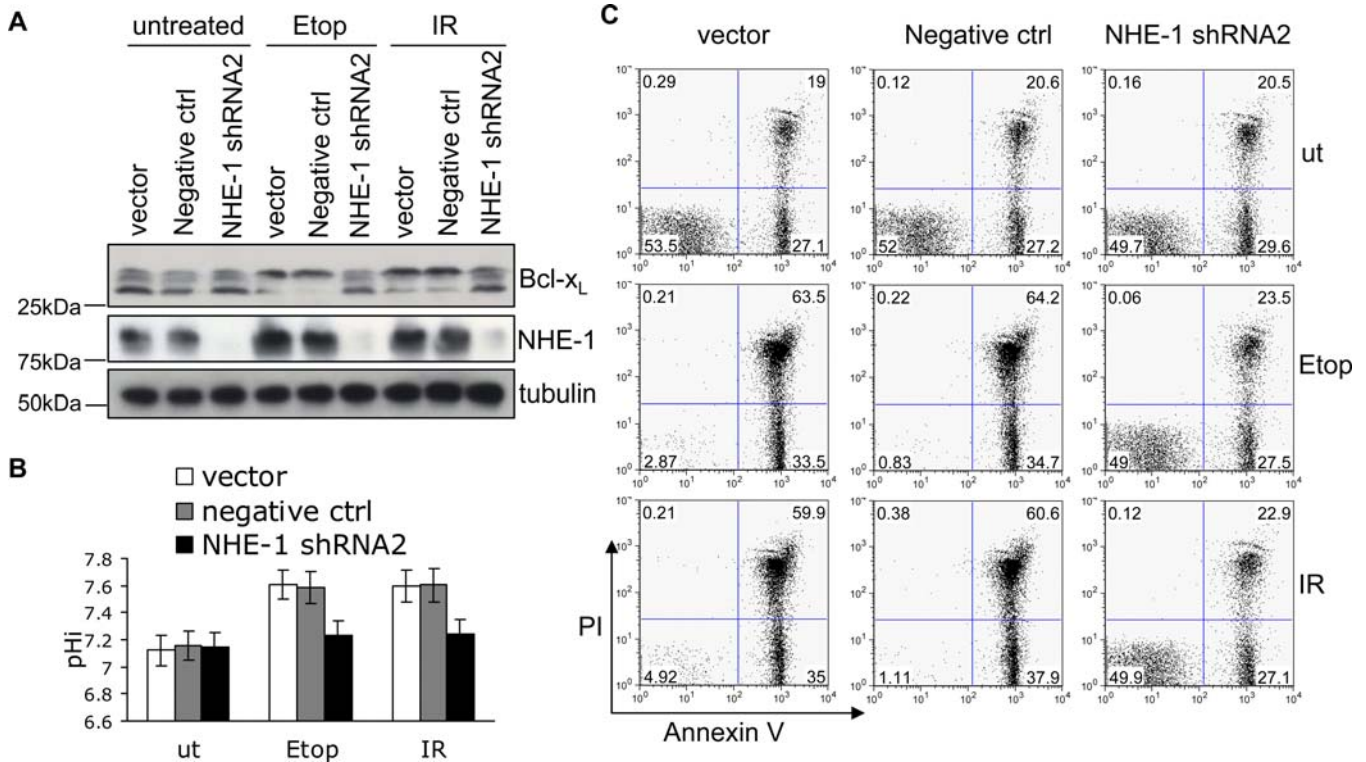

**Figure 5.** NHE-1 Knockdown Blocks DNA Damage-Induced Bcl-x<sub>L</sub> Deamidation and Apoptosis

(A) Empty vector, negative control, or NHE-1shRNA2 were transfected into wild-type thymocytes, then treated with Etoposide (Etop) or irradiation (IR) prior to immunoblotting for NHE-1 and Bcl-x<sub>L</sub>.

(B) Aliquots of the cells from (A) were analysed for pHi. The histogram represents mean values ± SD (n = 3).

(C) Aliquots of the cells from (A) were analysed for apoptosis by Annexin V/PI staining using flow cytometry, as illustrated in a representative experiment (total n = 5). The numbers shown are the percentage of cells in each quadrant. Histograms summarising the percentage of apoptotic cells (Annexin V<sup>+</sup>PI<sup>+</sup>) and dead cells (Annexin V<sup>+</sup>PI<sup>+</sup>) are shown in Figure 6B.

doi:10.1371/journal.pbio.0050001.g005

(apoptosis) values that were obtained either by DNA damage at physiological pH or by enforced alkalinisation without DNA damage. Conversely, incubation of B-CLL cells at lower pH inhibited DNA damage-induced Bcl-x<sub>L</sub> deamidation and apoptosis (Figure 6B). Therefore with respect to enforced changes in pHi, the B-CLL cells behaved in a comparable way to both murine thymocytes and tumour cells. A small increase in pHi induced by incubation in alkaline buffer in the absence of induced DNA damage generated as much, if not more, Bcl-x<sub>L</sub> deamidation and apoptosis as that triggered by genotoxic attack at physiological pH<sub>e</sub>.

NHE-1 expression in response to DNA damage was investigated in a further six B-CLL patients. Figure 6C shows by immunoblotting (right panel) that there was some variation between patients, but that in all cases (left panel), etoposide caused increased NHE-1 expression by 3 h, achieving optimal values by 6–9 h ranging from 1.9-fold–2.6-fold over basal levels. These increases correlate with the observed increases in Bcl-x<sub>L</sub> deamidation and apoptosis in patients' cells (Figure 6A) and at the 2.6-fold level, at least, are comparable with the increases observed in wild-type thymocytes (Figure 4B). Furthermore, DNA damage-induced Bcl-x<sub>L</sub> deamidation in B-CLL cells was prevented by addition of either cycloheximide (CHX) (Figure S8C) or DMA (Figure S8D), establishing a possible linkage between DNA damage, NHE-1 function, and Bcl-x<sub>L</sub> deamidation in human cancer cells.

## Discussion

It has previously been suggested that Bcl-x<sub>L</sub> deamidation is critical in the signalling pathway that leads from DNA damage to apoptosis [9]. This interpretation was based to a large degree on the observation that N52D/N66D Bcl-x<sub>L</sub>, one of the species generated by deamidation, can no longer exert anti-apoptotic activity nor sequester the pro-apoptotic protein Bim. However, a secondary mutation in the N52D/N66D Bcl-x<sub>L</sub> construct was later discovered, which, when corrected, restored binding, thereby casting doubt on the initial interpretation of the physiological significance of Bcl-x<sub>L</sub> deamidation [13]. We now propose that the initial finding was correct, but for the wrong reason. Our results indicate that the major Bcl-x<sub>L</sub> species generated by deamidation in situ is not Asp<sup>52</sup>/Asp<sup>66</sup> but iso-Asp<sup>52</sup>/iso-Asp<sup>66</sup>, which is consistent with the well-established biochemistry of Asn deamidation [1], and that this species is unable to sequester Bim or Puma (Figure 2 and Figure S2). The introduction of iso-Asp into the disordered loop in which these residues are located is expected to cause greater conformational change than Asp, because of the redirection of the peptide backbone through β carboxyl groups, as indicated by the known structural and functional changes that occur in proteins upon conversion of Asn to iso-Asp residues [26,27]. The structural importance of protein iso-Asp residues is likewise underlined by the expression of the putative repair enzyme

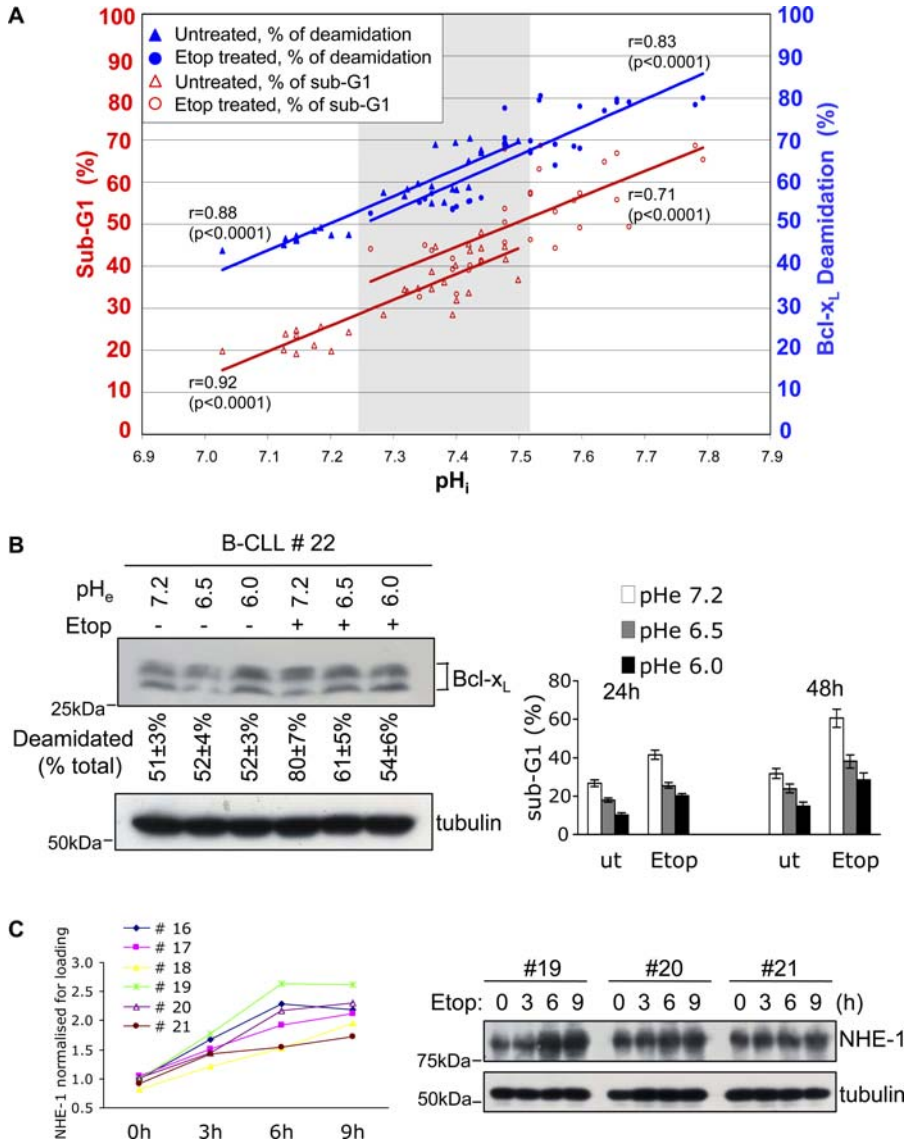

**Figure 6.** DNA Damage Induces NHE-1 Expression, and Enforced Alkalinisation Promotes Apoptosis of Human B-CLL cells

(A) Enforced alkalinisation of cancer cells from patients ( $n = 10$ ) with B-CLL causes Bcl-x<sub>L</sub> deamidation and associated cell death. Treatment with etoposide (Etop) in vitro further amplifies cell death. Patients' cells (PBMC, in the range 85%–95% CD19<sup>+</sup>B220<sup>+</sup>) were incubated at pH<sub>e</sub> values of 7.2, 8.0, or 8.5, and the pH<sub>i</sub> values were monitored by SNARF-1 staining using flow cytometry. Apoptosis was evaluated by measurement of sub-G1 peaks using flow cytometry. The data shows pooled results from ten patients via 30 values per treatment condition; due to identical values, some symbols overlap. The correlation coefficients ( $r$ ) of deamidation or sub-G1 versus pH<sub>i</sub> are shown for each treatment. The  $p$  value (significance) for each correlation is shown in parentheses. The correlation coefficients of sub-G1 versus deamidation are  $r = 0.92$  ( $p < 0.0001$ ) for untreated cells and  $r = 0.87$  ( $p < 0.0001$ ) for etoposide treated cells.

(B) Purified PBMC from B-CLL patients were cultured for 24 h in media at the pH shown, with/without etoposide for 48 h, and then analysed for Bcl-x<sub>L</sub> deamidation by immunoblotting (left panel). The upper and lower bands were quantified and the upper deamidated Bcl-x<sub>L</sub> band was expressed as a percentage of total Bcl-x<sub>L</sub>. The percentages shown below each lane are means  $\pm$  SD ( $n = 4$ ). The same cell aliquots cultured in RPMI/10% FCS for 24 h or 48 h were analysed for apoptosis by sub-G1 staining (right panel).

(C) Assessment of NHE-1 expression in B-CLL patients' samples following exposure to etoposide for the times shown. Representative immunoblotting results are shown for three patients in the right panel and the values for six patients (normalized for tubulin loading) are graphed in the left panel. doi:10.1371/journal.pbio.0050001.g006

L-isospartate O-methyltransferase which converts iso-Asp to Asp residues: its deletion has striking effects on protein functions [28–30]. Furthermore, comparison of the crystal structures of native rat Bcl-x<sub>L</sub> with its deamidated version has revealed significant differences [10]; the structural implications of introducing iso-Asp residues into the disordered loop environment of Asn<sup>52</sup>/Asn<sup>66</sup> merits further work.

We have identified critical elements in the signalling pathway leading from DNA damage to Bcl-x<sub>L</sub> deamidation

in thymocytes and have shown, as Figure 7A illustrates, that deamidation is induced upon DNA damage by up-regulation of the NHE-1 antiporter and consequent intracellular alkalinisation (Figures 3–5). To the best of our knowledge, this represents the first description of a molecular mechanism for the regulation of protein internal Asn deamidation in cells. Our results are consistent with the failure, until now, to identify genes encoding internal protein Asn deamidases [1]. The regulation of NHE-1 antiporter function is complex,

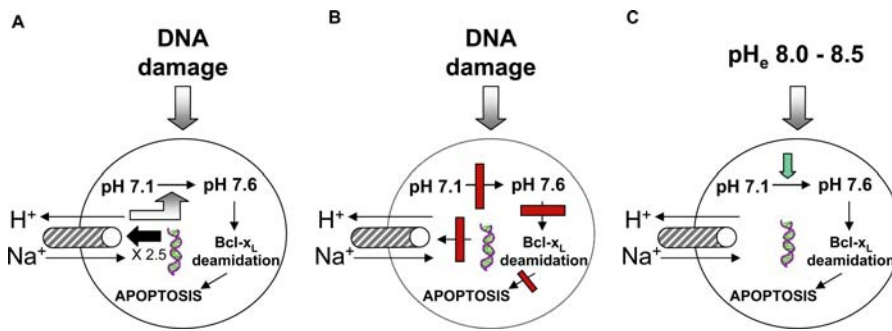

**Figure 7.** Models Illustrating the Linkage Between DNA Damage, the NHE-1 Antiport, Alkalinisation, Bcl-x<sub>L</sub> Deamidation, and Apoptosis in Wild-Type and Cancer Cells

(A) In wild-type thymocytes, DNA damage causes increased NHE-1 expression and a consequent rise in intracellular pH, Bcl-x<sub>L</sub> deamidation, and apoptosis. (B) In pretumorigenic thymocytes expressing an OTK, the DNA damage–induced rise in NHE-1 expression is blocked, preventing alkalisation, Bcl-x<sub>L</sub> deamidation, and apoptosis.

(C) Enforced alkalisation of murine tumour cells, or human B-CLL cells, causes Bcl-x<sub>L</sub> deamidation and subsequent apoptosis, even in the absence of external genotoxic attack.

doi:10.1371/journal.pbio.0050001.g007

involving modulation of its expression, phosphorylation, and binding of regulatory proteins [24,25,31]. Our data are consistent with a model in which DNA damage causes alkalisation by a direct 2–3-fold increase in NHE-1 expression (Figures 4B and 6C), although we cannot exclude the possibility that undetected changes in phosphorylation might shift the pH dependence of the antiport to a more alkaline range as described for myocardial tissue [32]. Furthermore, the calcineurin B homologous protein 1 (CHP-1) has been characterised as an essential cofactor for NHE-1 in normal tissues [33], whereas its CHP-2 homologue is up-regulated in transformed cells [34], so regulation of these proteins might also be involved in activation of the antiport. Intracellular NHE-1 mediated alkalisation has previously been implicated in the regulation of HL-60 cell apoptosis [35] and in apoptosis after trophic factor withdrawal [24]. In our present work, it is clear that the alkalising affects of DNA damage can be mimicked simply by overexpressing NHE-1 on wild-type thymocytes in the absence of DNA damage (Figure 4C). Furthermore, either inhibition or depletion of the antiport blocks DNA damage induced alkalisation, Bcl-x<sub>L</sub> deamidation, and apoptosis (Figures 4D, 5A–5C, and Figure S8D).

The direct role played by the deamidation of Bcl-x<sub>L</sub> to its iso-Asp<sup>52</sup>/iso-Asp<sup>66</sup> version in the signalling pathway from DNA damage to apoptosis is supported by the finding that either the N52D/N66D or N52A/N66A Bcl-x<sub>L</sub> mutants, which still bind BH3-only proteins (Figure 2E), protect thymocytes from dying upon enforced intracellular alkalisation (Figure 3G). An alternative hypothesis involves the generation of new BH3-only family members as a consequence of alkalisation, which compete for binding to Bcl-x<sub>L</sub>, thereby displacing Bim and Puma. However, such a hypothesis does not explain why the Bcl-x<sub>L</sub> mutants that still bind BH3-only proteins retain their anti-apoptotic potency at high pH (Figure 3G).

The striking blockade in DNA damage–induced NHE-1 expression, alkalisation, Bcl-x<sub>L</sub> deamidation, and apoptosis noted in *CD45*<sup>−/−</sup>*lck*<sup>F505</sup> pretumorigenic thymocytes (Figures 3 and 4), together with the reversal of this blockade by enforced expression of NHE-1 (Figure 4C), provide strong support for the model illustrated in Figure 7B. The oncogenic hyperactive p56<sup>lck-Y505F</sup> tyrosine kinase [15] must inhibit one

or more steps on the pathway from DNA damage to increased NHE-1 expression, a mechanism that is under active investigation. We have previously demonstrated in pretumorigenic thymocytes a tight correlation between inhibition of Bcl-x<sub>L</sub> deamidation, resistance to DNA damage induced apoptosis, and oncogenesis, suggesting that the consequent accumulation of DNA-damaged thymocytes is critical in the transforming process [14,15]. It therefore seems conceivable that the OTK-induced inhibition of NHE-1 is likewise important in thymic transformation, and further in vivo work will be necessary to investigate this possibility.

The resistance to genotoxic attack by *CD45*<sup>−/−</sup>*lck*<sup>F505</sup> murine tumour cells correlates, as in their pretumorigenic counterparts, with the inhibition of DNA damage–induced NHE-1 antiport expression, alkalisation, Bcl-x<sub>L</sub> deamidation, and apoptosis (Figure S7), which is an apparent example of “oncogene addiction”, whereby oncogene expression continues to be important for survival [36]. By contrast, DNA damage of human B-CLL cells, which should not express OTKs, triggered increased NHE-1 expression and apoptosis, achieving levels comparable with wild-type thymocytes (Figure 6C). However, enforced alkalisation of either the murine (Figure S7) or human (Figure 6) cancer cells triggered significant increases in Bcl-x<sub>L</sub> deamidation and apoptosis, even in the absence of genotoxic attack (Figure 7C). In the case of the B-CLL cells, we cannot yet exclude the possibility that the tight correlation observed between these events does not reflect causal efficacy, and further work will be necessary to elucidate this point. In any event, the key issue for cancer cell therapy in this context is not whether inhibition of Bcl-x<sub>L</sub> deamidation is involved in the initial transforming process, but whether Bcl-x<sub>L</sub> is the main prosurvival protein protecting the tumour cells from the normal consequences of DNA damage. An extensive literature suggests that Bcl-x<sub>L</sub> does indeed play this role in many tumour types [37]. For example, the down-regulation of Bcl-x<sub>L</sub> promoted the apoptosis of KARPAS-299 cells derived from a patient with anaplastic large cell lymphoma [38], and down-regulation of Bcl-x<sub>L</sub> suppresses the tumourigenic potential of the causative NPM-ALK oncogenic fusion protein in vivo [39]. Knockdown of Bcl-x<sub>L</sub> also significantly reduces the viability of pancreatic cancer cells to tumour necrosis factor α (TNF-α)– and

TNF- $\alpha$  - related apoptosis-inducing ligand (TRAIL)-mediated apoptosis by antitumour drugs [40]. Furthermore, Bcl-x<sub>L</sub> deamidation is inhibited in hepatocellular carcinomas, which are highly resistant to genotoxic treatments [11]. Our findings therefore have potential relevance to cancer therapy, whereby enforced alkalinisation, perhaps by amplification of NHE-1 expression, would promote Bcl-x<sub>L</sub> deamidation, thereby triggering apoptosis.

The pioneering work of Warburg [41] established that tumours display acidic extracellular pH, although more than half a century passed before it was clearly established that the intracellular pH of tumour cells is comparable with normal cells [42]. Warburg's legacy has included intermittent interest in the possibility of pH manipulation as a means to cancer therapy. Our findings not only establish that protein deamidation can be regulated by intracellular pH change in vivo, but they also suggest that strategies for pH manipulation in antineoplastic therapy should continue to receive attention, albeit for reasons different from those envisaged by Warburg.

## Materials and Methods

**Mice.** All mice were bred and housed in specific pathogen-free conditions in the animal facility at The Babraham Institute, Cambridge, United Kingdom. The p56<sup>Lck-F505</sup> (PLGF-A) transgenic mice [43] and the *CD45*<sup>-/-</sup> and *CD45*<sup>-/-</sup>lck<sup>F505</sup> mice have been previously described [16].

**Reagents and antibodies.** Etoposide, CHX, DMA, PI, monensin, nigericin, and goat-anti-rat immunoglobulin-agarose were from Sigma (St. Louis, Missouri, United States); protein A-sepharose and protein G-sepharose were from Amersham (Uppsala, Sweden); SNARF-1 was from Molecular Probes (Eugene, Oregon, United States); Z-VAD-fmk was from Santa Cruz Biotechnology. The following antibodies were used for Western Blotting: Bim (559685) from Pharmingen (San Diego, California, United States); Bcl-x<sub>L</sub> (610212) and NHE-1 (clone 54) from Transduction Lab (New Jersey, United States); Puma (ab9643) from Abcam (Cambridge, United Kingdom); Bax (06-499) and Bak (06-536) from Upstate (New York, United States); Caspase-9 (9504) from Cell Signaling (Beverly, Massachusetts, United States); phosphoserine detection kit from Calbiochem (Darmstadt, Germany);  $\beta$  actin and  $\alpha$  tubulin from Sigma.

**Recombinant Bcl-x<sub>L</sub> analysis.** Image clone (2823873) containing the sequence for human Bcl-x<sub>L</sub> was obtained from the MRC gene service (United Kingdom). The DNA coding amino acids 1–196 (of 233) was amplified by PCR and cloned into pENTR/D-TOPO (Invitrogen, Carlsbad, California, United States). The DNA was sequenced and the insert subcloned into pDEST17 (coding for a hexa-histidine tag) and transformed into *Escherichia coli* expression host DE3 (Novagen, Madison, Wisconsin, United States). Recombinant Bcl-x<sub>L</sub> (His-N terminal tagged) was expressed in *E. coli* and purified using Co<sup>2+</sup> chelation beads so that rapid elution could be performed at pH 7.0 to prevent deamidation. After anion exchange purification, three peaks (A, B, and C) were collected. Aliquots (1  $\mu$ l) of each peak were desalted for mass spectrometric analysis by solid-phase microextraction on C4 Zip Tips (Millipore, Billerica, Massachusetts, United States) and the proteins eluted with 0.1% formic acid/50% aqueous acetonitrile (1  $\mu$ l) directly into a nanospray tip (Protana Engineering, Odense, Denmark). The nanospray tip was inserted into a nano-electrospray ion source (Protana Engineering) attached to a quadrupole time-of-flight (TOF) mass spectrometer (Qstar Pulsar i, Applied Biosystems-MDS Sciex, Foster City, California, United States) and full scan TOF spectra were acquired at an ionization potential of 900V for 5 min over the mass/charge (*m/z*) range of 500–2000 atomic mass units. The mass spectrometric data were averaged and deconvoluted using the Bayesian Protein Reconstruct function in BioAnalyst software (Applied Biosystems). For nickel precipitation, each rBcl-x<sub>L</sub> species was added to C57BL/6 thymocyte lysates for 2 h at 4 °C at pH 7.2, and Ni<sup>2+</sup> beads were used to precipitate the rBcl-x<sub>L</sub> and complexed Bim.

**Mass spectrometric analysis of Bcl-x<sub>L</sub> peptides.** Samples of native and base-treated rBcl-x<sub>L</sub> (0.1  $\mu$ g/ $\mu$ l) were digested with chymotrypsin (sequencing grade, 10 ng/ $\mu$ l; Roche, Basel, Switzerland) in 0.1 M ammonium acetate pH 6.2 containing 0.1% octylglucoside for 16 h at

30 °C. These digestion conditions were chosen after careful optimisation to give good and consistent yields of the peptides SDVEENRTEAPEGTESEMETPSAINGNPSW (peptide 1) and HLA-SPAVNGATGHSSSL (peptide 2), containing the putative deamidation sites N52 and N66, respectively, but without inducing further deamidation. Aliquots of the digestion mixtures were analysed by liquid chromatography mass spectrometry (LC-MS) on a quadrupole TOF mass spectrometer (Qstar pulsar i, Applied Biosystems-MDS Sciex), with online separation by reversed-phase nano-LC. Peptides were eluted from the column (0.075 mm  $\times$  100 mm, Vydac C18) with a gradient of 5%–35% acetonitrile (containing 10 mM ammonium acetate pH 5.3) over 30 min at a flow rate of 250 nl/min. During the development phase of the methodology, the mass spectrometer was operated in MSMS mode to conclusively identify the peptide digestion products and to confirm the sites of deamidation as N52 and N66. Once the identities of the peptides had been established, the mass spectrometer was operated in MS mode for subsequent analyses.

For relative quantification of specific peptides, peak areas were obtained from extracted ion chromatograms of the monoisotopic mass of the corresponding pseudomolecular ions. These were: 816.60 ([M+4H]<sup>4+</sup> peptide 1), 816.85 ([M+4H]<sup>4+</sup> peptide 1 deamidated), 574.28 ([M+3H]<sup>3+</sup> peptide 2), and 574.61 ([M+3H]<sup>3+</sup> peptide 2 deamidated). The chromatographic conditions used for the separation of the peptides in the LC-MS analyses were optimised so as to resolve the Asn, Asp, and iso-Asp forms of peptides 1 and 2. The Asp and iso-Asp forms of the two peptides were identified by spiking an aliquot of a digestion mixture with Asp- or iso-Asp-containing synthetic peptides prior to LC-MS.

**DNA damage treatments.** Freshly isolated thymocytes were irradiated with 10 Gy using a caesium source or treated with etoposide in DMSO at a concentration of 25  $\mu$ M for murine cells, or 50  $\mu$ M for B-CLL cells, for the times indicated. Carrier DMSO was added to control cells.

**Immunoblotting and immunoprecipitation.** Cells were lysed in 50 mM HEPES (pH 7.2), 150 mM NaCl, 1mM EDTA, 0.2% NP-40, and complete protease inhibitors. Cell lysates were resolved by standard Laemmli's SDS-PAGE (pH 8.8) unless otherwise stated. For immunoprecipitations: rat Bim antibody (Oncogene, San Diego, California, United States) was coated to goat-anti-rat immunoglobulin-agarose; rabbit Puma antibody was coated to protein A-sepharose; mouse NHE-1 antibody was coated to protein G-sepharose; rabbit Bcl-x<sub>L</sub> antibody was coated to goat-anti-rabbit immunoglobulin-agarose. Lysates were precleared with the appropriate agarose. Quantification of immunoblots was carried out using a phosphorimager (Fuji FLA3000, <http://www.fujifilm.com>).

**Intracellular pH measurement.** Intracellular pH was measured using a standard ratiometric method with a pH-sensitive fluorophore SNARF-1 by flow cytometry [44]. Briefly, cells in phosphate-buffered saline (PBS) were loaded with 10  $\mu$ M SNARF-1 for 40 min at 37 °C, followed by washing and incubation in PBS at room temperature for 30 min prior to measurement of pH<sub>i</sub>. pH calibration was carried out using high potassium buffer with 10  $\mu$ M nigericin. FACS data were analysed using Flowjo software to obtain the ratio based on the FI3/FI2 channels. It should be noted that SNARF-1 measurements provide the average pH<sub>i</sub> of the intracellular environment in a cell population including, presumably, the contribution of acidified intracellular compartments. However, even if such compartments contribute slightly to the mean pH<sub>i</sub> values measured, in this work, it is the change in pH<sub>i</sub> that is most important. This point was also addressed by neutralising acidic compartments using monensin in some experiments.

**Measurement of apoptosis.** Cells were stained with 20  $\mu$ g/ml PI (with 50  $\mu$ g/ml RNase A) and analysed by flow cytometry, gating on the CD4<sup>+</sup>CD8<sup>-</sup> subset as necessary. The sub-G1 peak was quantified as a measure of apoptosis. In addition, apoptosis was measured using the Annexin-V-Fluorescence Staining Kit (Roche) according to the protocol provided. To measure the percentage of dead cells, PI was used at 0.5  $\mu$ g/ml.

**Generation of Bcl-x<sub>L</sub> mutants.** Mouse Bcl-x<sub>L</sub> cDNA was kindly provided by S. Korsmeyer (Howard Hughes Medical Institute, Harvard Medical School, Boston, Massachusetts, United States). N52A-N66A and N52D-N66D mutants were made using the Quick-Change Site-Directed Mutagenesis Kit from Stratagene (La Jolla, California, United States) according to the instructions provided. The sequences of the constructs were confirmed by DNA sequencing.

**Retroviral gene knockdown and overexpression.** Murine CD4<sup>+</sup>CD8<sup>-</sup> thymocytes were purified and cultured in the presence of interleukin-4 (IL-4) and PdBu as described [15]. The Suppressor-Retro kit was purchased from Imgenex (San Diego, California, United States), and NHE-1 shRNA sequences were designed using the "siRNA

tool” from the company’s website. Five selected sequences were cloned into pSuppressorRetro. The sequence of NHE-1 shRNA2 is 5'-GAAACAAAGCGCTCCATCAAC-3'. Retroviral production and infection were performed according to the protocol provided. For overexpression, NHE-1 or Bcl-x<sub>L</sub> (wild-type, N52A-N66A, and N52D-N66D) cDNA were amplified with AccuPrime Pfx DNA polymerase (Invitrogen), and cloned into XhoI and EcoRI sites of the multiple cloning sites of the MigRI vector [45] upstream of an internal entry site followed by enhanced green fluorescent protein (EGFP). The sequences of the inserts were verified by DNA sequencing. The plasmids were transfected into φNX cells using Lipofectamine (Invitrogen). Viral infection of CD4<sup>+</sup>CD8<sup>+</sup> thymocytes was performed by spinoculation (1,200 g for 90 min at 30 °C). To achieve high efficiency of gene transduction, the infection was repeated every 24 h for 2–3 d. GFP-positive cells were sorted by flow cytometry using a FACSAria.

**Bax, Bak double knockdown.** The SureSilencing shRNA kit for Bax and Bak was purchased from SuperArray (Frederick, Maryland, United States). One plasmid from each kit was screened out for the best gene ablation efficiency by transient transfection. The shRNA sequence for Bax is TCAGGATCGTCCACCAAGAA, and the shRNA sequence for Bak is GGGCTTAGGACTTGGTTTGT. To enrich the cells transfected with both plasmids which express GFP, the GFP sequence in the shRNA:Bak plasmid was replaced by DsRed using the SmaI restriction site before GFP and the AgeI restriction site after GFP. ShRNA:Bax-GFP and shRNA:Bak-DsRed were cotransfected into primary thymocytes using the Amaxa mouse T cell nucleofector kit (Amaxa Biosystems, Koeln, Germany). Cells positive for both GFP and DsRed were sorted by flow cytometry and used for subsequent experiments.

**B-CLL patients’ cell purification.** B-CLL donor peripheral blood was centrifuged through Lymphoprep (Axis-Shield PoC, Oslo, Norway), and the interphase peripheral blood mononuclear cells (PBMCs) were harvested for subsequent experiments. The purity of PBMCs was routinely checked by staining with antibodies CD3-Cy5, CD19-Fitc, and B220-PE and was analysed by flow cytometry.

**Statistics.** The Pearson coefficient of correlation (SPSS package, Chicago, Illinois, United States) was used to analyse the correlation between variables within the same group of data.

## Supporting Information

**Figure S1.** DNA Damage-Induced Bcl-x<sub>L</sub> Deamidation Correlates with the Kinetics of Thymic Apoptosis

(A) The membrane from Figure 1C was stripped and reprobed with caspase-9 antibody. Cleavage of caspase-9 following DNA damage was inhibited in Bax/Bak knock-down thymocytes.

(B) Wild-type thymocytes were cultured in RPMI-1640/10% bovine fetal calf serum with 25 μM etoposide for the times shown, and aliquots of cells from each time point were stained with 7-AAD and analysed by flow cytometry to estimate the percentage of cells undergoing apoptosis (sub-G1 peak expressed as a % of total cells). The data illustrate a representative experiment and the mean values ± SD from five independent experiments are quantified in (B) (blue bars).

(C) Aliquots of cells from the experiments shown in (A) were analysed for Bcl-x<sub>L</sub> expression by immunoblotting, and the membrane was reprobed with tubulin (loading control). The upper bands (deamidated) and lower band (native) of Bcl-x<sub>L</sub> were quantified using a phosphorimager, and the percentages of upper bands in comparison to the total (upper plus lower bands) were calculated. The mean values ± SD from five independent experiments are shown in the histogram (red line).

Found at doi:10.1371/journal.pbio.0050001.sg001 (976 KB TIF).

**Figure S2.** Deamidation Disrupts the Sequestration of BH3-Only Proteins by Bcl-x<sub>L</sub>

(A) Puma binds to the native but not deamidated form of Bcl-x<sub>L</sub>. Either wild-type ( $1.5 \times 10^7$ , lanes 3 and 4) or pretumorigenic *CD45<sup>-/-</sup>Lck<sup>F505</sup>* thymocytes ( $1.5 \times 10^7$ , lanes 5 and 6) were treated as in Figure 2A, and cells were lysed and subjected to immunoprecipitation with Puma antibody, followed by blotting with either Bcl-x<sub>L</sub> or Puma antibodies. Lane 1 is a wild-type thymocyte whole cell lysates (WCLs) control to facilitate comparison of native and deamidated forms of Bcl-x<sub>L</sub>. The asterisk indicates the light chain of the Puma antibody used for immunoprecipitation.

(B) Deamidated Bcl-x<sub>L</sub> from alkali treated thymocytes no longer binds to Bim. Wild-type thymocytes were incubated in neutral (pH 7.0) or

alkaline (pH 9.0) buffer at 37 °C for 24 h. Bim was immunoprecipitated from WCLs and WCL samples. Bim immunoprecipitates and Bim-depleted lysates were then separated and immunoblotted for either Bcl-x<sub>L</sub> or Bim.

Found at doi:10.1371/journal.pbio.0050001.sg002 (944 KB TIF).

**Figure S3.** The Asp and iso-Asp Forms of Bcl-x<sub>L</sub> Chymotryptic Peptides 1 and 2 Were Identified by Spiking an Aliquot of a Digestion Mixture with Asp- or iso-Asp-Containing Synthetic Peptides Before LC-MS

Peptides SDVEENRTEAPEGTESEMTPSAINGNPSW (peptide 1) and HLADSPAVNGATGHSSSL (peptide 2) and the corresponding deamidated forms, which contain the putative deamidation sites N52 and N66, respectively, were generated by digestion of rBcl-x<sub>L</sub> with chymotrypsin. The chromatographic conditions used for the separation of the peptides in the LC-MS analyses were optimised so as to resolve the Asn, Asp, and iso-Asp forms of peptides 1 and 2. The Asp and iso-Asp forms of the two peptides were identified by spiking an aliquot of a digestion mixture with Asp- or iso-Asp-containing synthetic peptides prior to LC-MS as shown. The chromatograms show LC-MS analyses at time point 72 h of the rBcl-x<sub>L</sub> base treatment.

Found at doi:10.1371/journal.pbio.0050001.sg003 (1.1 MB TIF).

**Figure S4.** DNA Damage-Induced NHE-1 Up-Regulation Is Mitochondrial Apoptosis-Independent

(A) Aliquots of the cells from Figure 1A incubated in the presence or absence of Z-VAD-fmk (200 μM) were analysed for the expression of NHE-1 and tubulin (as loading control) by immunoblotting.

(B) Aliquots of the cells from Figure 1C were analysed for the expression of NHE-1 by immunoblotting. Tubulin was reprobed as loading control.

Found at doi:10.1371/journal.pbio.0050001.sg004 (645 KB TIF).

**Figure S5.** Thymocytes Treated with DMA or Transduced with NHE-1 siRNA Display a Survival Advantage In Vitro Following DNA Damage

(A) Purified double-negative (DN) thymocytes treated with/without DMA, etoposide, or irradiation were cultured in vitro. At 24 h, 48 h, or 72 h, an aliquot of cells was analysed by PI staining (0.5 μg/ml) using flow cytometry; PI-positive cells represent dead cells.

(B) Purified DN thymocytes transduced with NHE-1 shRNA2 or empty vector were treated with or without etoposide and irradiation and then cultured in vitro. At 24 h, 48 h, or 72 h, an aliquot of cells was analysed as in (A).

Found at doi:10.1371/journal.pbio.0050001.sg005 (431 KB TIF).

**Figure S6.** Supplementary Information for NHE-1 Knockdown and Phosphorylation Analysis.

(A) Knockdown of NHE-1 by shRNA. NHE-1 shRNA (shRNA1–5), negative control, and empty vector were transduced into wild-type thymocytes. Immunoblotting for NHE-1 and tubulin showed that shRNA2 is the most potent shRNA2 inhibiting NHE-1 expression; soshRNA2 was used in subsequent experiments.

(B) The histograms summarise the percentage of apoptotic cells (Annexin V<sup>+</sup>PI<sup>-</sup>) and dead cells (Annexin V<sup>+</sup>PI<sup>+</sup>) from the experiment illustrated in Figure 5C. The data are means based on five independent experiments.

(C) The Ser phosphorylation of the NHE-1 antiport remains unchanged following DNA damage. Wild-type or *CD45<sup>-/-</sup>Lck<sup>F505</sup>* thymocytes were exposed to 5 Gy of irradiation and maintained in culture for the times shown. NHE-1 immunoprecipitates were then immunoblotted for p-Ser (16B4). The membrane was stripped and reprobed for total NHE-1. The histogram shows the relative quantification of p-Ser ±SD from three independent experiments. Lane 1 was defined as 1 (\*). Note that immunoblotting with one additional p-Ser antibody and two additional p-Thr antibodies gave comparable results to those shown here.

Found at doi:10.1371/journal.pbio.0050001.sg006 (1.0 MB TIF).

**Figure S7.** Primary Tumour Cells Are Resistant to DNA Damage-Induced Bcl-x<sub>L</sub> Deamidation and Apoptosis, but Enforced Alkalinisation Overcomes this Resistance.

(A) DNA damage-induced Bcl-x<sub>L</sub> deamidation is inhibited in *CD45<sup>-/-</sup>Lck<sup>F505</sup>* tumour cells. Wild-type, *CD45<sup>-/-</sup>Lck<sup>F505</sup>* pretumorigenic, and *CD45<sup>-/-</sup>Lck<sup>F505</sup>* tumour cells were either treated with etoposide for 24 h or exposed to 5 Gy of irradiation and then cultured for 24 h. Cells were lysed and subjected to immunoblotting for Bcl-x<sub>L</sub> or tubulin (loading control).

(B) Intracellular alkalinisation and apoptosis induced by DNA

damage are both inhibited in *CD45<sup>-/-</sup>Lck<sup>F505</sup>* tumour cells. pH<sub>i</sub> (upper panel) and apoptosis (lower panel) were analysed as in Figure 3A and Figure 1A.

(C) DNA damage causes up-regulation of NHE-1 in wild-type but not in *CD45<sup>-/-</sup>Lck<sup>F505</sup>* tumour cells. Wild-type thymocytes or *CD45<sup>-/-</sup>Lck<sup>F505</sup>* tumour cells were either treated with etoposide (Etop) for 5 h or exposed to 5 Gy of irradiation and then maintained in culture for 5 h, followed by immunoblotting for NHE-1 or tubulin. The histogram shows the quantification of NHE-1 expression from five independent experiments SD. Lane 3 was defined as 1(\*).

(D) *CD45<sup>-/-</sup>Lck<sup>F505</sup>* tumour cells were cultured in the media with the pH<sub>e</sub> as shown without monensin, treated with irradiation or etoposide, and analysed for Bcl-x<sub>L</sub> deamidation by immunoblotting. The percentage deamidation was calculated as in Figure 1B.

(E) Aliquots of the cells used for (D) were assessed for pH<sub>i</sub>.

(F) Aliquots of the cells used for (D) were assessed for apoptosis. The histograms represent mean values ± SD (*n* = 3).

(A) shows that Bcl-x<sub>L</sub> deamidation following DNA damage was suppressed in primary tumour cells to the same extent as in pretumorigenic thymocytes 24 h after inducing DNA damage, although after 48 h, the inhibition of deamidation was somewhat less (68.1% ± 5.2% inhibition in tumour cells compared to 96.2% ± 3.8% in pretumorigenic thymocytes, unpublished data). Likewise, alkalisation (B, upper panel), apoptosis (B, lower panel) and increased NHE-1 expression (C) were all suppressed in tumour cells to nearly the same extent as in pretumorigenic thymocytes. Furthermore, in the absence of monensin, extracellular buffers at pH 8.0–8.5 forced pH<sub>i</sub> values of 7.5–7.7 (E) triggering Bcl-x<sub>L</sub> deamidation (D) and apoptosis (F). It is particularly striking that incubation in buffer at pH 8.0, for example, which achieves a pH<sub>i</sub> value of 7.43, triggers 66.4% and 36.6% levels of Bcl-x<sub>L</sub> deamidation and apoptosis, respectively, irrespective of whether, in addition, DNA damage was induced by etoposide or by γ irradiation. These results show that murine tumour cells resistant to genotoxic insult at physiological pH<sub>i</sub> values can be sensitised to die by enforced alkalisation leading to Bcl-x<sub>L</sub> deamidation.

Found at doi:10.1371/journal.pbio.0050001.sg007 (1.3 MB TIF).

**Figure S8.** Inhibition of NHE-1 Synthesis by CHX or Inhibition of NHE-1 Function by DMA in B-CLL Cells Blocks DNA Damage-Induced Bcl-x<sub>L</sub> Deamidation

(A) Replotting of data from Figure 6A to show the absolute mean

values SD (*n* = 10) for Bcl-x<sub>L</sub> deamidation (right panel) and apoptosis (left panel) obtained at each of the three extracellular pH values investigated. The numbers at the top of each bar represent the mean pH<sub>i</sub> values measured in the cells incubated at the pH<sub>e</sub> values shown. (B) A representative Bcl-x<sub>L</sub> Western blot from the B-CLL samples analysed in Figure 6A is shown.

(C) B-CLL patients' PBMCs were treated with/without CHX, etoposide, and irradiation as in Figure 4A, 48 h later cells were subjected to immunoblotting for Bcl-x<sub>L</sub>. A representative blot from four independent experiments is shown. Tubulin was reprobed as loading control.

(D) B-CLL patients' PBMCs were treated with/without DMA, etoposide, and irradiation as in Figure 4D, 48 h later cells were subjected to immunoblotting for Bcl-x<sub>L</sub>. A representative blot from four independent experiments is shown. Tubulin was reprobed as loading control.

Found at doi:10.1371/journal.pbio.0050001.sg008 (1.2 MB TIF).

#### Accession Numbers

The GenBank (<http://www.ncbi.nlm.nih.gov/Genbank>) accession numbers for proteins discussed in this paper are: Bcl-x<sub>L</sub> (BC019307), Bim (NM009754), NHE-1 (BC052708), and Puma (U82987).

#### Acknowledgments

We are grateful to the late Professor S. Korsmeyer for the provision of a reagent, to Cindy Webb for animal husbandry, to Geoff Morgan for help with the FACS facility, to Anne Segonds-Pichon for advice in statistical analysis, and to Klaus Okkenhaug for suggestions on the manuscript.

**Author contributions.** RZ and DRA conceived and designed the experiments. RZ, DO, and TSS performed the experiments. RZ, DO, and TSS analyzed the data. GAF and ARG contributed reagents/materials/analysis tools. DRA wrote the paper.

**Funding.** Financial support was provided by the Biotechnology and Biological Sciences Research Council and Association for International Cancer Research.

**Competing interests.** The authors have declared that no competing interests exist.

#### References

- Robinson NE, Robinson AB (2004) Molecular clocks: Deamidation of asparaginyl and glutaminyl residues in peptides and proteins. *Cave Junction* (Oregon): Althouse Press, 419 p.
- Chao X, Muff TJ, Park SY, Zhang X, Pollard AM, et al. (2006) A receptor-modifying deamidase in complex with a signaling phosphatase reveals reciprocal regulation. *Cell* 124: 561–571.
- Robinson NE (2002) Protein deamidation. *Proc Natl Acad Sci U S A* 99: 5283–5288.
- Robinson NE, Robinson ZW, Robinson BR, Robinson AL, Robinson JA, et al. (2004) Structure-dependent nonenzymatic deamidation of glutaminyl and asparaginyl pentapeptides. *J Pept Res* 63: 426–436.
- Moss CX, Matthews SP, Lamont DJ, Watts C (2005) Asparagine deamidation perturbs antigen presentation on class II MHC molecules. *J Biol Chem* 280: 18,498–18,503.
- Hanson SR, Hasan A, Smith DL, Smith JB (2000) The major in vivo modifications of the human water-insoluble lens crystallins are disulfide bonds, deamidation, methionine oxidation and backbone cleavage. *Exp Eye Res* 71: 195–207.
- Hoffmann C, Pop M, Leemhuis J, Schirmer J, Aktories K, et al. (2004) The *Yersinia pseudotuberculosis* cytotoxic necrotizing factor (CNFY) selectively activates RhoA. *J Biol Chem* 279: 16026–16032.
- Aswad DW, Paranandi MV, Schurter BT (2000) Isoaspartate in peptides and proteins: Formation, significance, and analysis. *J Pharm Biomed Anal* 21: 1129–1136.
- Deverman BE, Cook BL, Manson SR, Niederhoff RA, Langer EM, et al. (2002) Bcl-x<sub>L</sub> deamidation is a critical switch in the regulation of the response to DNA damage. *Cell* 111: 51–62.
- Aritomi M, Kunishima N, Inohara N, Ishibashi Y, Ohta S, et al. (1997) Crystal structure of rat Bcl-x<sub>L</sub>. Implications for the function of the Bcl-2 protein family. *J Biol Chem* 272: 27886–27892.
- Takehara T, Takahashi H (2003) Suppression of Bcl-x<sub>L</sub> deamidation in human hepatocellular carcinomas. *Cancer Res* 63: 3054–3057.
- Chang CY, Lin YM, Lee WP, Hsu HH, Chen EI (2006) Involvement of Bcl-X(L) deamidation in E1A-mediated cisplatin sensitization of ovarian cancer cells. *Oncogene* 25: 2656–2665.
- Deverman BE, Cook BL, Manson SR, Niederhoff RA, Langer EM, et al.

(2003) Erratum: Bcl-x<sub>L</sub> deamidation is a critical switch in the regulation of the response to DNA damage. *Cell* 115: 503.

- Alexander DR (2004) Oncogenic tyrosine kinases, DNA repair and survival: The role of Bcl-x(L) deamidation in transformation and genotoxic therapies. *Cell Cycle* 3: 584–587.
- Zhao R, Yang FT, Alexander DR (2004) An oncogenic tyrosine kinase inhibits DNA repair and DNA damage-induced Bcl-x<sub>L</sub> deamidation in T cell transformation. *Cancer Cell* 5: 37–49.
- Baker M, Gamble J, Tooze R, Higgins D, Yang FT, et al. (2000) Development of T-leukaemias in CD45 tyrosine phosphatase-deficient mutant *lck* mice. *EMBO J* 19: 4644–4654.
- Lindsten T, Thompson CB (2006) Cell death in the absence of Bax and Bak. *Cell Death Differ* 13: 1272–1276.
- Cheng EH, Wei MC, Weiler S, Flavell RA, Mak TW, et al. (2001) BCL-2, BCL-X(L) sequester BH3 domain-only molecules preventing BAX- and BAK-mediated mitochondrial apoptosis. *Mol Cell* 8: 705–711.
- Villunger A, Michalak EM, Coultas L, Mullauer F, Bock G, et al. (2003) p53- and drug-induced apoptotic responses mediated by BH3-only proteins puma and noxa. *Science* 302: 1036–1038.
- Jeffers JR, Parganas E, Lee Y, Yang C, Wang J, et al. (2003) Puma is an essential mediator of p53-dependent and -independent apoptotic pathways. *Cancer Cell* 4: 321–328.
- Mollenhauer HH, Morre DJ, Rowe LD (1990) Alteration of intracellular traffic by monensin; mechanism, specificity and relationship to toxicity. *Biochim Biophys Acta* 1031: 225–246.
- Lagadic-Gossmann D, Huc L, Lecreur V (2004) Alterations of intracellular pH homeostasis in apoptosis: Origins and roles. *Cell Death Differ* 11: 953–961.
- Tsao N, Lei HY (1996) Activation of the Na(+)/H(+) antiporter, Na+/HCO<sub>3</sub>(-)/CO<sub>3</sub>(2-) cotransporter, or Cl(-)/HCO<sub>3</sub>(-) exchanger in spontaneous thymocyte apoptosis. *J Immunol* 157: 1107–1116.
- Khaled AR, Moor AN, Li A, Kim K, Ferris DK, et al. (2001) Trophic factor withdrawal: p38 mitogen-activated protein kinase activates NHE1, which induces intracellular alkalization. *Mol Cell Biol* 21: 7545–7557.
- Putney LK, Denker SP, Barber DL (2002) The changing face of the Na(+)/H(+) exchanger, NHE1: Structure, regulation, and cellular actions. *Annu Rev Pharmacol Toxicol* 42: 527–552.

26. Capasso S, Di Donato A, Esposito L, Sica F, Sorrentino G, et al. (1996) Deamidation in proteins: The crystal structure of bovine pancreatic ribonuclease with an isoaspartyl residue at position 67. *J Mol Biol* 257: 492–496.
27. Noguchi S, Miyawaki K, Satow Y (1998) Succinimide and isoaspartate residues in the crystal structures of hen egg-white lysozyme complexed with tri-N-acetylchitotriose. *J Mol Biol* 278: 231–238.
28. Kim E, Lowenson JD, MacLaren DC, Clarke S, Young SG (1997) Deficiency of a protein-repair enzyme results in the accumulation of altered proteins, retardation of growth, and fatal seizures in mice. *Proc Natl Acad Sci U S A* 94: 6132–6137.
29. Young AL, Carter WG, Doyle HA, Mamula MJ, Aswad DW (2001) Structural integrity of histone H2B in vivo requires the activity of protein L-isoaspartate O-methyltransferase, a putative protein repair enzyme. *J Biol Chem* 276: 37161–37165.
30. Reissner KJ, Aswad DW (2003) Deamidation and isoaspartate formation in proteins: Unwanted alterations or surreptitious signals? *Cell Mol Life Sci* 60: 1281–1295.
31. Slepko E, Fliedel L (2002) Structure and function of the NHE1 isoform of the Na<sup>+</sup>/H<sup>+</sup> exchanger. *Biochem Cell Biol* 80: 499–508.
32. Fliedel L (2001) Regulation of myocardial Na<sup>+</sup>/H<sup>+</sup> exchanger activity. *Basic Res Cardiol* 96: 301–305.
33. Pang T, Su X, Wakabayashi S, Shigekawa M (2001) Calcineurin homologous protein as an essential cofactor for Na<sup>+</sup>/H<sup>+</sup> exchangers. *J Biol Chem* 276: 17367–17372.
34. Pang T, Wakabayashi S, Shigekawa M (2002) Expression of calcineurin B homologous protein 2 protects serum deprivation-induced cell death by serum-independent activation of Na<sup>+</sup>/H<sup>+</sup> exchanger. *J Biol Chem* 277: 43771–43777.
35. Zhu WH, Loh TT (1995) Effects of Na<sup>+</sup>/H<sup>+</sup> antiport and intracellular pH in the regulation of HL-60 cell apoptosis. *Biochim Biophys Acta* 1269: 122–128.
36. Jonkers J, Berns A (2004) Oncogene addiction: Sometimes a temporary slavery. *Cancer Cell* 6: 535–538.
37. Amundson SA, Myers TG, Scudiero D, Kitada S, Reed JC, et al. (2000) An informatics approach identifying markers of chemosensitivity in human cancer cell lines. *Cancer Res* 60: 6101–6110.
38. Zamo A, Chiarle R, Piva R, Howes J, Fan Y, et al. (2002) Anaplastic lymphoma kinase (ALK) activates Stat3 and protects hematopoietic cells from cell death. *Oncogene* 21: 1038–1047.
39. Coluccia AM, Perego S, Cleris L, Gunby RH, Passoni L, et al. (2004) Bcl-XL downregulation suppresses the tumorigenic potential of NPM/ALK in vitro and in vivo. *Blood* 103: 2787–2794.
40. Bai J, Sui J, Demirjian A, Vollmer CM Jr., Marasco W, et al. (2005) Predominant Bcl-XL knockdown disables antiapoptotic mechanisms: Tumor necrosis factor-related apoptosis-inducing ligand-based triple chemotherapy overcomes chemoresistance in pancreatic cancer cells in vitro. *Cancer Res* 65: 2344–2352.
41. Warburg O (1930) *The metabolism of tumours*: London: Constable Press. 327 p.
42. Griffiths JR (1991) Are cancer cells acidic? *Br J Cancer* 64: 425–427.
43. Abraham KM, Levin SD, Marth JD, Forbush KA, Perlmutter RM (1991) Delayed thymocyte development induced by augmented expression of p56lck. *J Exp Med* 173: 1421–1432.
44. Chow S, Hedley D, Tannock I (1996) Flow cytometric calibration of intracellular pH measurements in viable cells using mixtures of weak acids and bases. *Cytometry* 24: 360–367.
45. He X, Dave VP, Zhang Y, Hua X, Nicolas E, et al. (2005) The zinc finger transcription factor Th-POK regulates CD4 versus CD8 T-cell lineage commitment. *Nature* 433: 826–833.
